# Supplementary material
Source: PubMed Central journal article supplement (PMC11216157)
Supplement: NIHMS2002092-supplement-Supplement.pdf [file NIHMS2002092-supplement-Supplement.pdf]

## Supplemental Methods

### Study design, IRB and ethical considerations

The UK Biobank is a phenotyped, prospective, population-based cohort of 500,000 individuals between the ages of 40-69 recruited by mail from 2006-2010<sup>(1)</sup>. Within the UK Biobank, some 100,000 individuals underwent cardiac magnetic resonance (CMR) imaging<sup>(2, 3)</sup>. Cardiac magnetic resonance imaging was performed with 1.5 Tesla scanners (MAGNETOM Aera, Siemens Healthcare), using electrocardiographic gating for cardiac synchronization<sup>(3)</sup>. In total, quality control measures detailed in our previous work suggest that in this study, 2.3 million images from 45,000 individuals would be eligible for analysis<sup>(4)</sup>. UK Biobank access is provided under application 7089. Analysis is approved by the Mass General Brigham institutional review board (protocol 2003P001563). Identifiers of UK Biobank subjects who have withdrawn consent since the time of their enrollment are regularly distributed by the repository; these subjects are excluded from future analyses.

### Annotation

Segmentation maps of the cine images have been traced manually (MN) as supervised by a cardiologist (JPP). In our prior work we noted that a similar downstream deep learning model for CMR images produced optimum downstream pixel accuracy when trained with at least 116 manually annotated images, and that additional accuracy gleaned from training with up to 500 manually annotated images was modest<sup>(4)</sup>. Thus, in the present work 250 samples were chosen at random, manually segmented, and then used to train a deep learning model with fastai v1.0.5945<sup>(5)</sup>. The model was U-net derived with an encoder pre-trained on ImageNet to optimize for the recognition of natural shapes<sup>(6, 7)</sup>. Training and validation subsets comprised 80% and 20% of the samples, respectively. The training model was found to achieve 99.8% pixel

segmentation accuracy (Jaccard agreement 84.3%) for annotation of the LVOT in the held-out validation set. Pulmonary artery segmentation was used as a secondary annotation metric; for this structure the pixel segmentation accuracy was found to be 99.9% (Jaccard agreement 87.3%).

#### Calculation of diameters of anatomic structures

The LVOT, the aortic root, and the ascending aorta, are captured in the long axis of the contiguous tract they form. As annotated in this plane, the LVOT, aortic root, and proximal part of the ascending aorta often appear to be rectangular. To extract their diameters, first, the centerline of the contiguous tract formed by the LV cavity, LVOT, aortic root, and ascending aorta was calculated using the algorithm skeletonize implemented by the image processing package scikit-image<sup>(8,9)</sup>. Orthogonal measurements to the tract centerline were taken at the respective centroids of the LVOT and aortic root complex. These normal lines were then intersected with the boundaries of the respective structure to give two coordinates representing the bounds of the diameter measurements. The Euclidean distance between the diameter boundaries, converted from pixels to millimeters based on image metadata, represented the diameters of the LVOT and aortic root (**Figure 1**).

For the ascending aorta, rather than a single diameter taken at the centroid, we took several diameters that we sought to align between participants to represent similar levels of aorta. To achieve this, we used height as a proxy for aorta length. We defined the centerline at the border with the sinotubular junction as a reference point. We then identified the point on the centerline 3 mm distal to this border, and via a perpendicular line as for the proximal structures, measured a diameter at this point (“Aorta 0”). We then took subsequent diameters of the aorta at intervals of 10 mm multiplied by the ratio of the participant’s height to the mean height of the dataset (i.e.

169 cm). For example, a participant of mean height would have diameters of the aorta taken, starting at the border with the aortic root, at 3 mm, 13 mm, 23 mm, and so on (see **Supplemental Table 5** for descriptions of all phenotypes). These measurements are taken closer together for a shorter-than-average participant and farther apart for a taller-than-average participant. Because a variable length of aorta was visualized across participants (and across studies) because of variation in its orientation relative to the imaging plane, the number of ascending aorta diameters that we could measure for each participant was, similarly, variable.

Quality control of image segmentation and phenotype extraction

Images were filtered to those containing one component for each of: left ventricle cavity, LVOT, and aortic root. Images containing an LV cavity of less than 100 pixels were discarded due to biologic implausibility. Phenotypic measurements of LVOT diameter, aortic root diameter, or ascending aorta diameter at any level less than 1cm were discarded due to biologic implausibility. If a given participant was imaged on multiple occasions, we kept only the first study in order to facilitate comparisons with prior published work. It was observed that greater than 50% of the participants in the dataset had measurements of the aorta at levels Aorta 0 through Aorta 5. More distal levels were thus excluded due to incompleteness.

We observed that the contiguous tract of LVOT, aortic root, and ascending aorta were most often captured in correct planar arrangement at the beginning of the MRI CINE: a point of the cardiac cycle corresponding to left ventricular end-diastole. Other points of the cardiac cycle, for example ventricular end-systole, failed to capture the aorta in-plane. Therefore, for a given MRI study, we chose the first frame for subsequent analysis, or the second frame if the first frame had failed upstream QC. We confirmed that the mean LV cavity size using this approach very closely approximated the corresponding value if instead the maximum LV cavity for each participant

were chosen. We thus concluded that choosing the first or second frame of the study appropriately maximized the likelihood of a correct planar arrangement while remaining very close to true ventricular end-diastole.

To identify any remaining images with an incorrect planar arrangement, we exploited the fact that we have previously measured the diameter of the ascending aorta in its cross section (short axis) using a different deep learning model trained by different operators<sup>(4)</sup>. We compared the present work's estimates of structure diameters against the previously published diameters of ascending aorta in its short axis. We found that the LVOT-view-derived diameters for ascending aorta at position Aorta 2 correlated most strongly with the previously published phenotype (Pearson's  $r = 0.83$ ). We then investigated the ratio of LVOT-view-derived diameters to the previously published short axis diameter and found that the ratio closely approached parity at aorta position 2 (median = 0.98, interquartile range = 0.08). As such, we hypothesized that the previously investigated short axis plane was likely taken most often nearest to the position labeled Aorta 2 in our present study. As discussed in **Supplemental Methods: Calculation of diameters of anatomic structures**, this point corresponds to approximately 23 mm distal to the border with the aortic root for a participant of average height.

We further hypothesized that points for which the relationship between the LVOT-view-derived diameter Aorta 2 and the short axis diameter of the aorta diverges significantly from a linear relationship represent out-of-plane images. We thus constructed a linear model relating these two phenotypes and obtained 99% prediction intervals for all values of the independent variable: ascending aorta taken from the LVOT view at position 2. Those points with a corresponding ascending aorta diameter derived from its short axis view fell outside the 99% prediction intervals were discarded. To avoid accidentally yielding signals of known disease, we excluded

participants with prevalent atrial fibrillation, heart failure, myocardial infarction, or coronary artery disease prior to MRI (n = 1948, 5% of the pre-exclusion group). We finally excluded participants with lack of genetic data, sample QC missing rate greater than or equal to 2%, sex chromosome aneuploidy, or outlier status for heterozygosity (n = 1452, 4% of the pre-exclusion group) (**Supplemental Figure 1**). After final quality control, up to 33,870 participants remained to be included in a GWAS; sample size decreased for GWAS traits of more distal ascending aorta given its variable visualization (**Supplemental Table 3**).

#### Genotyping and genome-wide association studies

Genotype information was obtained using either the UK BiLEVE or UK Biobank Axiom arrays; they were then imputed into the Haplotype Reference Consortium panel and the UK10K+1000 Genomes panel<sup>(10)</sup>. Participants were filtered to exclude those without imputed genetic data and those with a genotypic call rate < 0.98. Heritability values of structures of interest were then calculated using BOLT-REML on the genotyped variants in the UK Biobank<sup>(11)</sup>. Covariates included age at time of MRI, the first five principal components of ancestry, sex, the genotyping array, and the MRI scanner's unique identifier<sup>(12)</sup>. The latter covariate was included in this and other analyses to account for any potential differences in machine or image reconstruction variables between imaging sites.

Genome-wide association was tested using REGENIE 2.0.2, using the full autosomal panel of directly genotyped SNPs as the genetic relationship matrix and structure diameters as continuous phenotypes, as discussed<sup>(13)</sup>. GWAS covariates included age at time of MRI, the first five principal components of ancestry, sex, the genotyping array, and the MRI scanner's unique identifier<sup>(12)</sup>. The genome-wide significance threshold for SNPs was  $P < 5 \times 10^{-8}$ . To identify independently associated variants, linkage disequilibrium clumping was performed in the same

participants used to create the GWAS using plink-1.9 using a 5 megabase radius, an  $r^2$  cutoff of 0.001, and the genome-wide P threshold<sup>(14)</sup>. For comparison of loci reaching genome-wide significance for multiple traits, a given locus was assigned a shared “global” locus identifying number with any other loci within 500 kilobases. Lead SNPs were tested for deviation from Hardy-Weinberg equilibrium (HWE) at the commonly-used threshold  $P < 1 \times 10^{-6}$ . BOLT-REML v2.3.4 was used to assess the SNP heritability of all phenotypes<sup>(11)</sup>.

#### Exome sequencing in UK Biobank

We conducted an exome sequencing analysis on over 200,000 exomes released by the UK Biobank. Samples from the UK Biobank were chosen for exome sequencing based on enrichment for MRI data and linked health records<sup>(15)</sup>. Exome sequencing was performed by Regeneron and reprocessed centrally by the UK Biobank following the Functional Equivalent pipeline<sup>(16)</sup>. Exomes were captured with the IDT xGen Exome Research Panel v1.0. The basic design targets 39Mbp of the human genome (19,396 genes). Multiplexed samples were sequenced with dual-indexed 75x75bp paired-end reads on the Illumina NovaSeq 6000 platform using S2 (first 50k samples) and S4 flow cells (subsequent 150k samples). Alignment to GRCh38 was performed in an alt-aware manner as described in the Functional Equivalence protocol. Individual level VCF files were combined and joint-genotyped using GLnexus after Variants were called per-sample using DeepVariant. We applied hard filters low-quality genotypes:

1. For homozygous reference calls: Genotype Quality  $< 20$ ; Genotype Depth  $< 10$ ;  
Genotype Depth  $> 200$

2. For heterozygous calls:  $(A1 \text{ Depth} + A2 \text{ Depth}) / \text{Total Depth} < 0.9$ ;  $A2 \text{ Depth} / \text{Total Depth} < 0.2$ ; Genotype likelihood[ref/ref] < 20; Genotype Depth < 10; Genotype Depth > 200
3. For homozygous alternative calls:  $(A1 \text{ Depth} + A2 \text{ Depth}) / \text{Total Depth} < 0.9$ ;  $A2 \text{ Depth} / \text{Total Depth} < 0.9$ ; Genotype likelihood[ref/ref] < 20; Genotype Depth < 10; Genotype Depth > 200

Then, we performed variant level filters. Low-quality variants were removed followed by: Call rate < 90%, Hardy-Weinberg Equilibrium p-value < 10<sup>-15</sup>, present in Ensembl low-complexity regions, monomorphic variants in the final dataset. Finally, we calculated a few sample quality metrics and removed low-quality samples. Samples with withdrawn consent, sex mismatch, call rate < 90%, outliers (8 standard deviations apart from mean) of transition/transversion ratio, heterozygote/homozygote ratio, SNP/Indel ratio, and the number of singletons were removed. Variants were annotated with the Ensembl Variant Effect Predictor version 95 using the --pick-allele flag<sup>(17)</sup>. LOFTEE was used to identify high-confidence loss of function variants: stop-gain, splice-site disrupting, and frameshift variants<sup>(18)</sup>. To understand population-level frequencies of variants, we annotated 5 continental variant frequencies using gnomAD v2.

#### Rare variant association test

We conducted a collapsing burden test to assess the impact of loss-of-function variants in up to 18,461 participants who had measurements of diameters of interest and exome sequencing data available. Variants with  $MAF \geq 0.001$  or continental maximum  $MAF \geq 0.001$  were excluded. Using the LOFTEE “high-confidence” loss-of-function variants without a flag, we tested whether loss-of-function carrier status was associated with ascending aorta traits using the linear mixed-effect approach implemented in the R-package GENESIS. The model was adjusted for

age at MRI, sex, the MRI serial number, sequencing batch, associated PCs, and empirical kinship matrix. Protein-coding genes with the number of carriers <10 were removed from the results.

#### Comparison with prior work

We sought to compare our GWAS results with those of comparable studies. We identified one that investigated the genetics of ascending aorta diameter at a comparable anatomic location and one that investigated the genetics of aortic root diameter at a comparable anatomic location<sup>(4, 19)</sup>. To our knowledge, no prior study investigated the genetics of the LVOT diameter in a comparable way. For both aorta and aortic root, we deemed a trait novel if it was both (1) outside 500 kilobases from all SNPs in the prior work and (2) not in linkage disequilibrium with any SNP in the prior work. To query linkage disequilibrium we queried all SNPs with rsIDs against the associated prior work's SNPs using LDlink, specifying European populations to best match the UK Biobank participants and using an LD cutoff of  $r^2 > 0.01$ <sup>(20)</sup>. In one instance, LDlink was unable to resolve a SNP described in the present work (at chr5:15005465, associated with aortic root diameter). In this case we manually confirmed that there were no previously described SNPs in the associated prior work within 100 megabases.

#### Aortic disease codes

International Classification of Diseases version 10 (ICD-10) codes and Office of Population Censuses and Surveys Classification of Interventions and Procedures version 4 (OPCS-4) codes used to define diseases of interest are detailed in **Supplemental Table 1**. These definitions were used for GWAS participant exclusion and polygenic score assessment.

#### Trait-disease correlation

We sought to validate our diameters by investigating their correlations to prevalent disease (**Supplemental Table 6**). To do so we constructed linear models investigating the presence or



absence of a disease of interest as predicted by the inverse normal diameter of interest. Due to small available numbers of follow up (n = 12 for thoracic aortic aneurysm and n = 99 for aortic stenosis), these models are not adjusted for other covariates in order to avoid overfitting..

#### Association between polygenic risk scores and incident disease

Using PRSCs (<https://github.com/getian107/PRSCs>; git hash

43128be7fc9ca16ad8b85d8754c538bcfb7ec7b4), we computed polygenic risk scores for participants in the UK Biobank with genetic data available<sup>(21)</sup>. We computed a separate score using the GWAS of each described phenotype, using the autosomal, independently significant SNPs of the respective GWAS. We excluded participants whose data were used for the GWAS. We confirmed that polygenic scores were still well-correlated to their upstream traits by Pearson's r, despite the inverse normal transformation applied to traits prior to GWAS (Supplemental Table 7).

We analyzed the relationship between the resultant polygenic scores for individuals and several events using both unadjusted survival analyses and Cox proportional hazards models that were also adjusted for clinical risk factors. The events included incident thoracic aortic aneurysm (427,016 individuals, 743 events) and aortic stenosis (426,502 individuals, 3,604 events). There are limited data regarding clinical risk factors for thoracic aortic aneurysm outside of associated syndromes and family history, so we chose putatively relevant covariates based in part on inference from evidence in the abdominal aortic aneurysm literature<sup>(22)</sup>. These covariates included sex, body mass (the cubic natural spline of BMI), age (the cubic natural spline of age at enrollment, and its interaction with age), and blood pressure (the cubic natural splines of systolic and diastolic blood pressure measurements). We also adjusted for other covariates including the cubic natural spline of height, the cubic natural spline of weight, the genotyping array, and the

first five principal components of ancestry. This analysis was performed separately for each of the polygenic risk scores listed above. Proportional hazards violations were observed during modeling, so the results were confirmed with accelerated failure time models, which showed similar results (Supplemental Table 10). 47 participants were excluded from accelerated failure time models predicting aortic stenosis due to sub-year survival (1.3% of the original dataset,  $N_{\text{disease}} = 3551$ ), which was felt unlikely to influence overall concordance of results with those of Cox proportional hazards.

**Supplemental Figure 1: Quality control for GWAS**

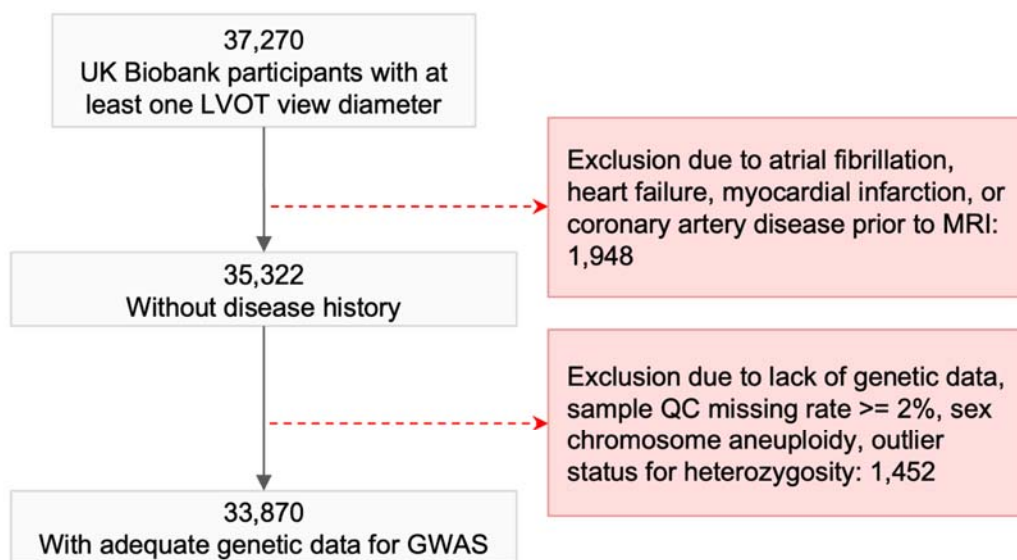

**Supplemental Figure 2:** Distributions of extracted diameters

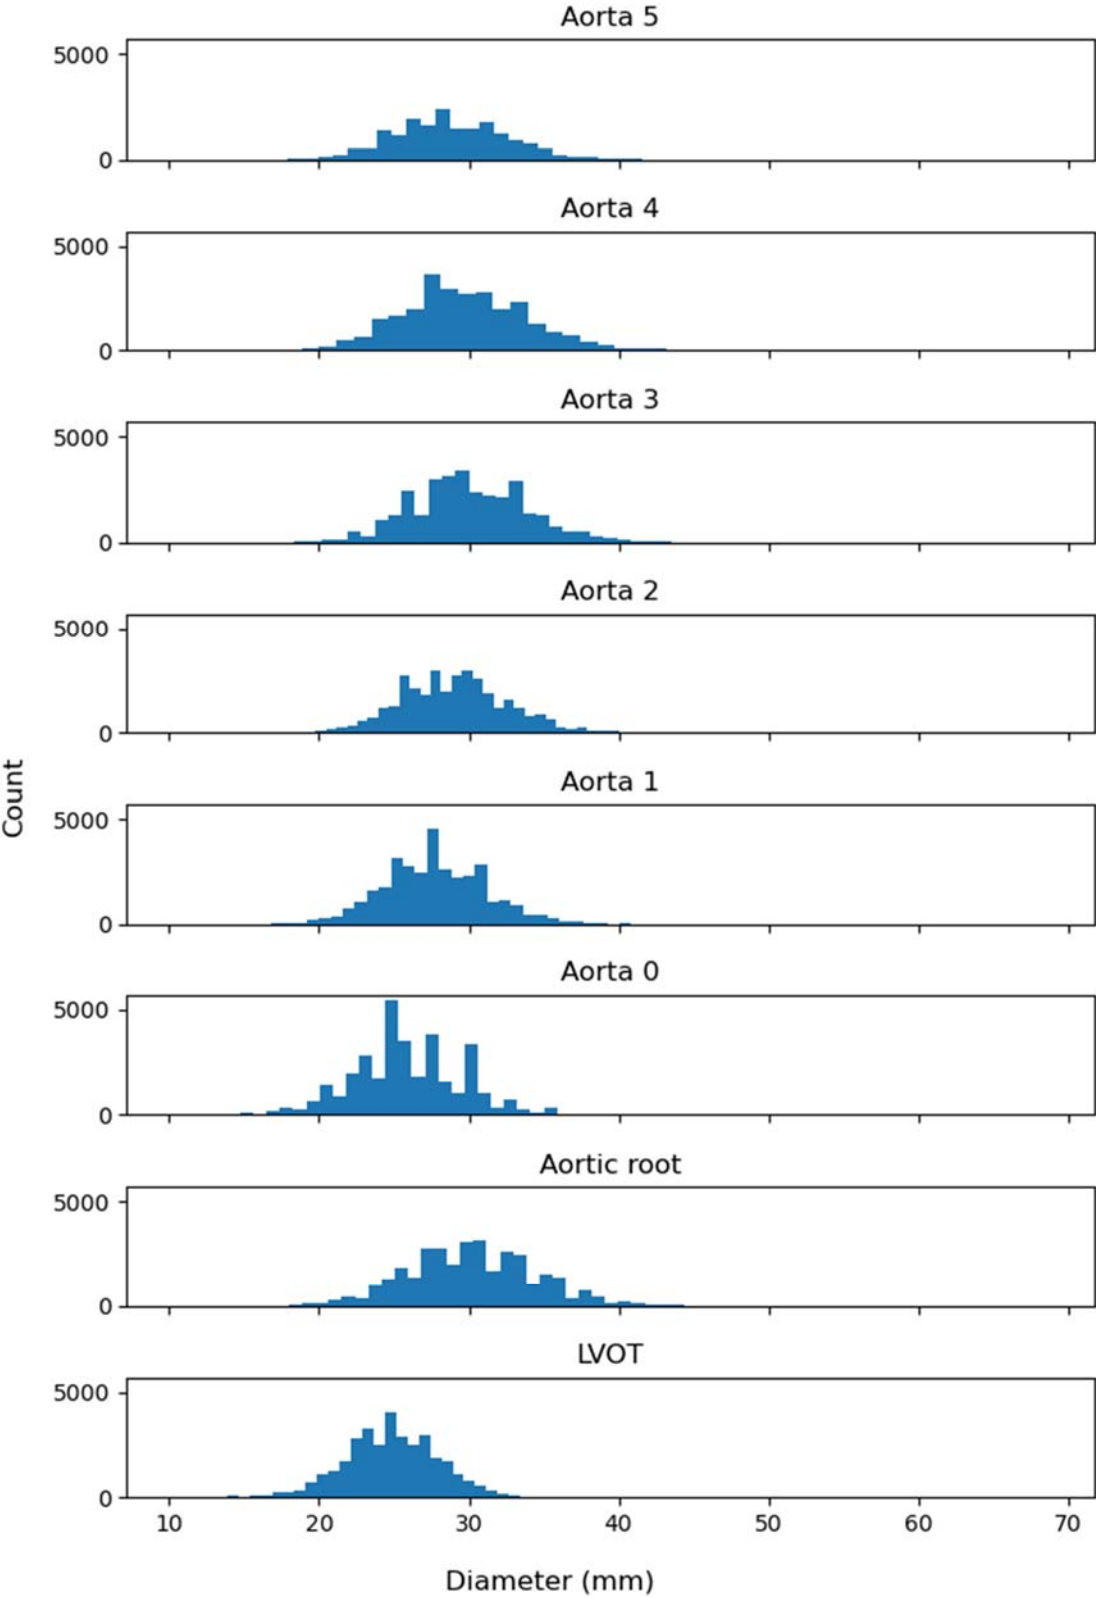

**Supplemental Figure 3:** Genetic correlations between inverse normal of traits

|             |             |         |         |         |         |         |         |        |
|-------------|-------------|---------|---------|---------|---------|---------|---------|--------|
| Aorta 5     |             |         |         |         |         |         |         | 0.231  |
| Aorta 4     |             |         |         |         |         |         | 1       | 0.22   |
| Aorta 3     |             |         |         |         |         | 0.983   | 0.958   | 0.223  |
| Aorta 2     |             |         |         |         | 0.998   | 0.952   | 0.964   | 0.235  |
| Aorta 1     |             |         |         | 0.98    | 0.963   | 0.909   | 0.927   | 0.247  |
| Aorta 0     |             |         | 0.98    | 0.904   | 0.869   | 0.844   | 0.808   | 0.32   |
| Aortic root |             | 0.897   | 0.755   | 0.647   | 0.578   | 0.562   | 0.557   | 0.248  |
| LVOT        | 0.794       | 0.65    | 0.519   | 0.403   | 0.345   | 0.359   | 0.425   | 0.38   |
|             | Aortic root | Aorta 0 | Aorta 1 | Aorta 2 | Aorta 3 | Aorta 4 | Aorta 5 | Height |

Supplemental Figure 4: Clustering of significant genetic associations

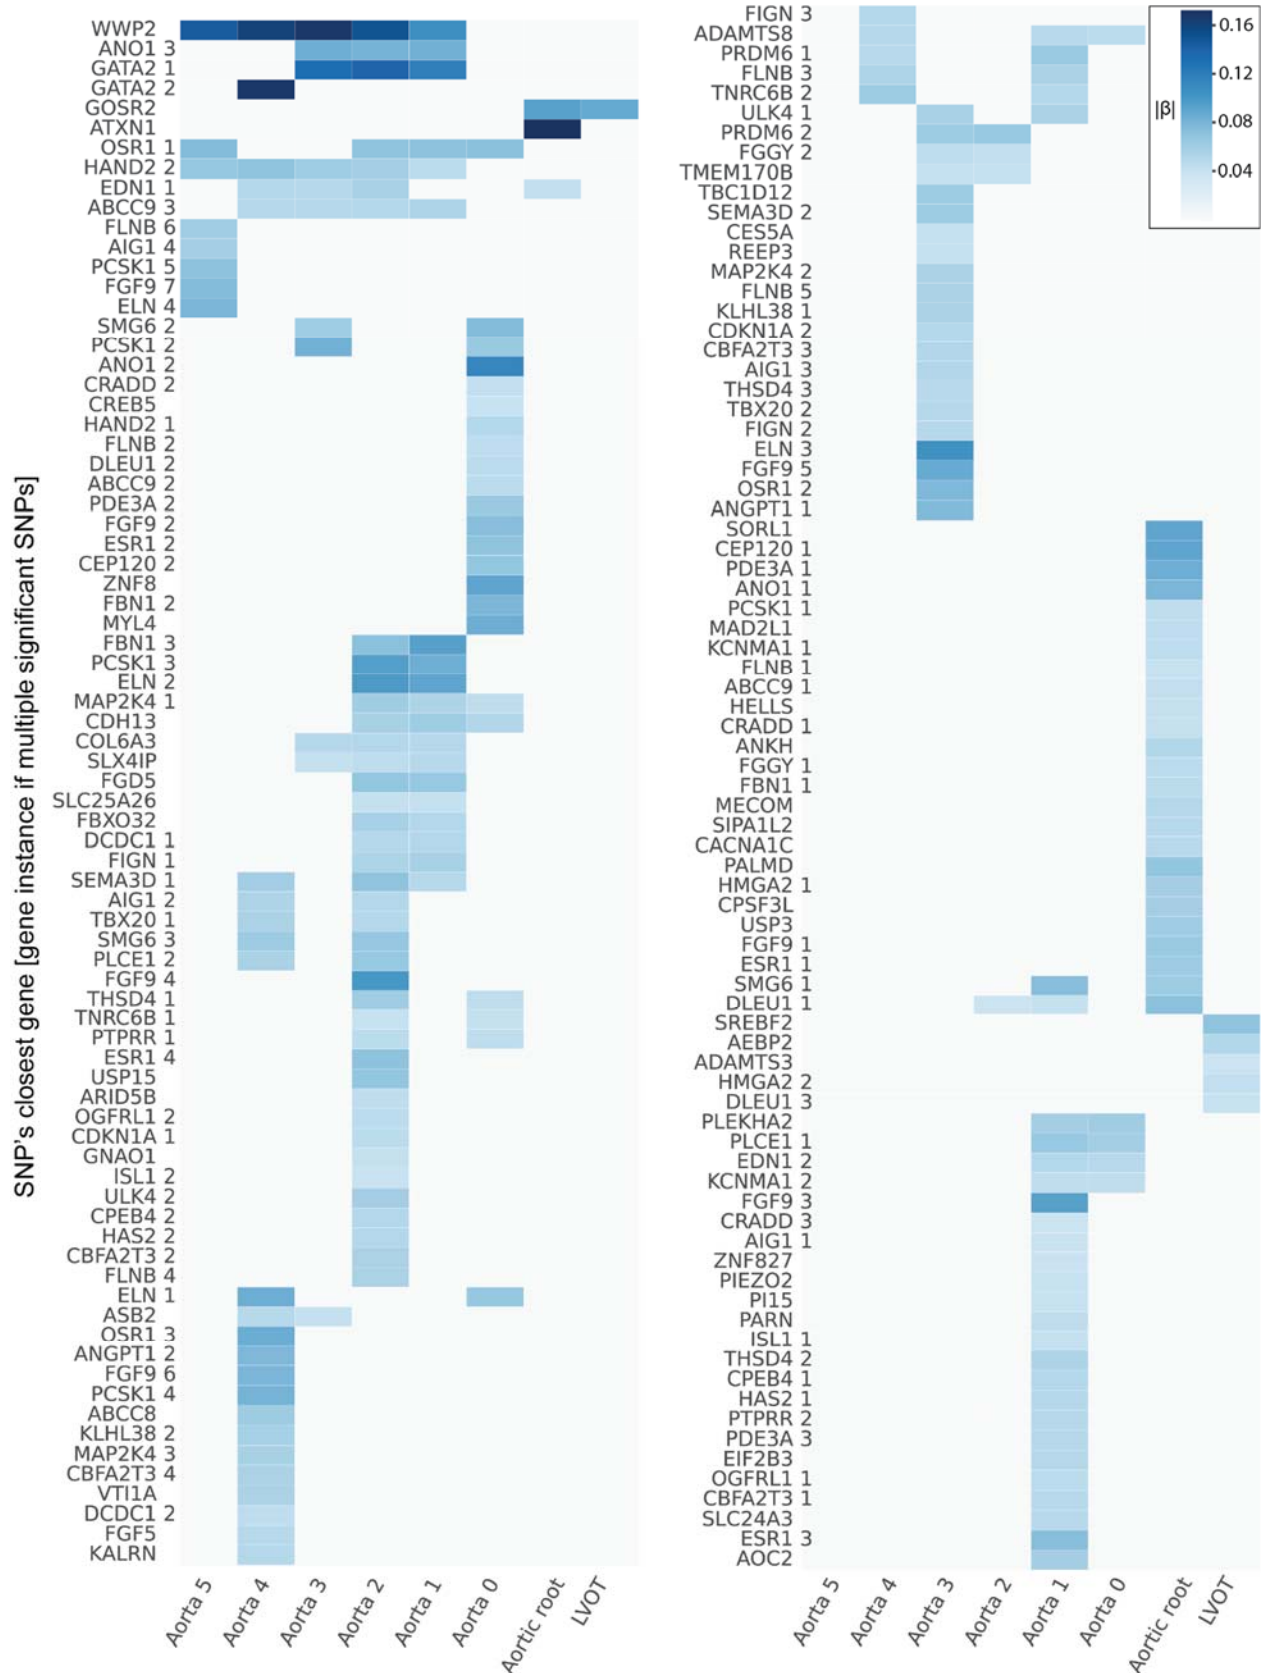

Column position denotes associated GWAS in fixed order. Rows denote SNPs associated with one or more traits at  $P < 5 \times 10^{-8}$ . Row labels display genes nearest to associated SNPs. Where multiple SNPs share a closest gene, a number displays the gene's instance in the combined significant GWAS results. See Supplemental Table 8 for SNP names corresponding to row labels. Color indicates absolute effect size ( $|\beta|$ ) per standard error of a SNP associated at  $P < 5 \times 10^{-8}$ . To illustrate anatomic relationship of genome-wide significant SNPs, heatmap column position is hierarchically clustered to group SNP associations of similar significance ( $P$ ). For this illustrative purpose, SNPs not meeting genome-wide significance are assigned  $P = 0$ .

**Supplemental Table 1: Disease Codes**

| <b>Pathology</b>               | <b>Definition<br/>[includes/<br/>excludes]<br/>code</b> | <b>Code<br/>type</b>                   | <b>Diagnosis code</b>                                                                       |
|--------------------------------|---------------------------------------------------------|----------------------------------------|---------------------------------------------------------------------------------------------|
| Aortic stenosis                | include                                                 | ICD10                                  | I06.0 Rheumatic aortic stenosis                                                             |
| Aortic stenosis                | include                                                 | ICD10                                  | I06.2 Rheumatic aortic stenosis with insufficiency                                          |
| Aortic stenosis                | include                                                 | ICD10                                  | I35.0 Aortic (valve) stenosis                                                               |
| Aortic stenosis                | include                                                 | ICD10                                  | I35.2 Aortic (valve) stenosis with insufficiency                                            |
| Aortic stenosis                | include                                                 | Non-cancer illness code, self-reported | aortic stenosis                                                                             |
| Atrial fibrillation or flutter | include                                                 | OPCS4                                  | K57.1 Percutaneous transluminal ablation of atrioventricular node                           |
| Atrial fibrillation or flutter | include                                                 | OPCS4                                  | K62.1 Percutaneous transluminal ablation of pulmonary vein to left atrium conducting system |



|                                   |         |       |                                                                                               |
|-----------------------------------|---------|-------|-----------------------------------------------------------------------------------------------|
| Atrial fibrillation<br>or flutter | include | OPCS4 | K62.2 Percutaneous transluminal ablation of atrial wall for atrial flutter                    |
| Atrial fibrillation<br>or flutter | include | OPCS4 | K62.3 Percutaneous transluminal ablation of conducting system of heart for atrial flutter NEC |
| Atrial fibrillation<br>or flutter | include | OPCS4 | K62.4 Percutaneous transluminal internal cardioversion NEC                                    |
| Atrial fibrillation<br>or flutter | include | OPCS4 | X50.1 Direct current cardioversion                                                            |
| Atrial fibrillation<br>or flutter | include | OPCS4 | X50.2 External cardioversion NEC                                                              |
| Atrial fibrillation<br>or flutter | include | ICD10 | I48 Atrial fibrillation and flutter                                                           |
| Atrial fibrillation<br>or flutter | include | ICD10 | I48.0 Paroxysmal atrial fibrillation                                                          |
| Atrial fibrillation<br>or flutter | include | ICD10 | I48.1 Persistent atrial fibrillation                                                          |
| Atrial fibrillation<br>or flutter | include | ICD10 | I48.2 Chronic atrial fibrillation                                                             |
| Atrial fibrillation               | include | ICD10 | I48.3 Typical atrial flutter                                                                  |

|                                   |         |                                                      |                                                              |
|-----------------------------------|---------|------------------------------------------------------|--------------------------------------------------------------|
| or flutter                        |         |                                                      |                                                              |
| Atrial fibrillation<br>or flutter | include | ICD10                                                | I48.4 Atypical atrial flutter                                |
| Atrial fibrillation<br>or flutter | include | ICD10                                                | I48.9 Atrial fibrillation and atrial flutter,<br>unspecified |
| Atrial fibrillation<br>or flutter | include | ICD9                                                 | 4273 Atrial fibrillation and flutter                         |
| Atrial fibrillation<br>or flutter | include | Non-<br>cancer<br>illness<br>code, self-<br>reported | atrial fibrillation                                          |
| Atrial fibrillation<br>or flutter | include | Non-<br>cancer<br>illness<br>code, self-<br>reported | atrial flutter                                               |
| Atrial fibrillation<br>or flutter | include | Operation<br>code                                    | cardioversion                                                |
| Coronary artery                   | include | OPCS4                                                | K40.1 Saphenous vein graft replacement of one                |

|                         |         |       |                                                                          |
|-------------------------|---------|-------|--------------------------------------------------------------------------|
| disease                 |         |       | coronary artery                                                          |
| Coronary artery disease | include | OPCS4 | K40.2 Saphenous vein graft replacement of two coronary arteries          |
| Coronary artery disease | include | OPCS4 | K40.3 Saphenous vein graft replacement of three coronary arteries        |
| Coronary artery disease | include | OPCS4 | K40.4 Saphenous vein graft replacement of four or more coronary arteries |
| Coronary artery disease | include | OPCS4 | K41.1 Autograft replacement of one coronary artery NEC                   |
| Coronary artery disease | include | OPCS4 | K41.2 Autograft replacement of two coronary arteries NEC                 |
| Coronary artery disease | include | OPCS4 | K41.3 Autograft replacement of three coronary arteries NEC               |
| Coronary artery disease | include | OPCS4 | K41.4 Autograft replacement of four or more coronary arteries NEC        |
| Coronary artery disease | include | OPCS4 | K45.1 Double anastomosis of mammary arteries to coronary arteries        |
| Coronary artery disease | include | OPCS4 | K45.2 Double anastomosis of thoracic arteries to coronary arteries NEC   |

|                         |         |       |                                                                                                                   |
|-------------------------|---------|-------|-------------------------------------------------------------------------------------------------------------------|
| Coronary artery disease | include | OPCS4 | K45.3 Anastomosis of mammary artery to left anterior descending coronary artery                                   |
| Coronary artery disease | include | OPCS4 | K45.4 Anastomosis of mammary artery to coronary artery NEC                                                        |
| Coronary artery disease | include | OPCS4 | K45.5 Anastomosis of thoracic artery to coronary artery NEC                                                       |
| Coronary artery disease | include | OPCS4 | K49.1 Percutaneous transluminal balloon angioplasty of one coronary artery                                        |
| Coronary artery disease | include | OPCS4 | K49.2 Percutaneous transluminal balloon angioplasty of multiple coronary arteries                                 |
| Coronary artery disease | include | OPCS4 | K49.8 Other specified transluminal balloon angioplasty of coronary artery                                         |
| Coronary artery disease | include | OPCS4 | K49.9 Unspecified transluminal balloon angioplasty of coronary artery                                             |
| Coronary artery disease | include | OPCS4 | K50.2 Percutaneous transluminal coronary thrombolysis using streptokinase                                         |
| Coronary artery disease | include | OPCS4 | K75.1 Percutaneous transluminal balloon angioplasty and insertion of 1-2 drug-eluting stents into coronary artery |

|                         |         |                                        |                                                                                                                         |
|-------------------------|---------|----------------------------------------|-------------------------------------------------------------------------------------------------------------------------|
| Coronary artery disease | include | OPCS4                                  | K75.2 Percutaneous transluminal balloon angioplasty and insertion of 3 or more drug-eluting stents into coronary artery |
| Coronary artery disease | include | OPCS4                                  | K75.3 Percutaneous transluminal balloon angioplasty and insertion of 1-2 stents into coronary artery                    |
| Coronary artery disease | include | OPCS4                                  | K75.4 Percutaneous transluminal balloon angioplasty and insertion of 3 or more stents into coronary artery NEC          |
| Coronary artery disease | include | OPCS4                                  | K75.8 Other specified percutaneous transluminal balloon angioplasty and insertion of stent into coronary artery         |
| Coronary artery disease | include | OPCS4                                  | K75.9 Unspecified percutaneous transluminal balloon angioplasty and insertion of stent into coronary artery             |
| Coronary artery disease | include | Source of myocardial infarction report | Self-reported only                                                                                                      |

|                         |         |                                        |                                                                                                   |
|-------------------------|---------|----------------------------------------|---------------------------------------------------------------------------------------------------|
| Coronary artery disease | include | Source of myocardial infarction report | Hospital admission                                                                                |
| Coronary artery disease | include | Source of myocardial infarction report | Death only                                                                                        |
| Heart failure           | include | ICD10                                  | I11.0 Hypertensive heart disease with (congestive) heart failure                                  |
| Heart failure           | include | ICD10                                  | I13.0 Hypertensive heart and renal disease with (congestive) heart failure                        |
| Heart failure           | include | ICD10                                  | I13.2 Hypertensive heart and renal disease with both (congestive) heart failure and renal failure |
| Heart failure           | include | ICD10                                  | I25.5 Ischaemic cardiomyopathy                                                                    |
| Heart failure           | include | ICD10                                  | I42.0 Dilated cardiomyopathy                                                                      |
| Heart failure           | include | ICD10                                  | I42.5 Other restrictive cardiomyopathy                                                            |

|               |         |                                        |                                     |
|---------------|---------|----------------------------------------|-------------------------------------|
| Heart failure | include | ICD10                                  | I42.8 Other cardiomyopathies        |
| Heart failure | include | ICD10                                  | I42.9 Cardiomyopathy, unspecified   |
| Heart failure | include | ICD10                                  | I50 Heart failure                   |
| Heart failure | include | ICD10                                  | I50.0 Congestive heart failure      |
| Heart failure | include | ICD10                                  | I50.1 Left ventricular failure      |
| Heart failure | include | ICD10                                  | I50.9 Heart failure, unspecified    |
| Heart failure | include | ICD9                                   | 4254 Other primary cardiomyopathies |
| Heart failure | include | ICD9                                   | 4280 Congestive heart failure       |
| Heart failure | include | ICD9                                   | 4281 Left heart failure             |
| Heart failure | include | Non-cancer illness code, self-reported | heart failure/pulmonary odema       |
| Heart failure | include | Non-cancer illness code, self-reported | cardiomyopathy                      |

|                          |         |                                        |                                                                                                 |
|--------------------------|---------|----------------------------------------|-------------------------------------------------------------------------------------------------|
| Heart failure            | exclude | ICD10                                  | I42.1 Obstructive hypertrophic cardiomyopathy                                                   |
| Heart failure            | exclude | ICD10                                  | I42.2 Other hypertrophic cardiomyopathy                                                         |
| Heart failure            | exclude | Non-cancer illness code, self-reported | hypertrophic cardiomyopathy (hcm / hocm)                                                        |
| Pulmonary hypertension   | include | ICD9                                   | 4160 Primary pulmonary hypertension                                                             |
| Pulmonary hypertension   | include | ICD10                                  | I27.0 Primary pulmonary hypertension                                                            |
| Pulmonary hypertension   | include | ICD10                                  | I27.2 Other secondary pulmonary hypertension                                                    |
| Thoracic aortic aneurysm | include | ICD10                                  | I71.1 Thoracic aortic aneurysm, ruptured                                                        |
| Thoracic aortic aneurysm | include | ICD10                                  | I71.2 Thoracic aortic aneurysm, without mention of rupture                                      |
| Thoracic aortic aneurysm | include | OPCS4                                  | K33.1 Aortic root replacement using pulmonary valve autograft with right ventricle to pulmonary |



|                          |         |       |                                                                                                          |
|--------------------------|---------|-------|----------------------------------------------------------------------------------------------------------|
|                          |         |       | artery valved conduit                                                                                    |
| Thoracic aortic aneurysm | include | OPCS4 | K33.3 Aortic root replacement using homograft                                                            |
| Thoracic aortic aneurysm | include | OPCS4 | K33.4 Aortic root replacement using mechanical prosthesis                                                |
| Thoracic aortic aneurysm | include | OPCS4 | K33.5 Aortic root replacement NEC                                                                        |
| Thoracic aortic aneurysm | include | OPCS4 | L18.1 Emergency replacement of aneurysmal segment of ascending aorta by anastomosis of aorta to aorta    |
| Thoracic aortic aneurysm | include | OPCS4 | L18.2 Emergency replacement of aneurysmal segment of thoracic aorta by anastomosis of aorta to aorta NEC |
| Thoracic aortic aneurysm | include | OPCS4 | L19.1 Replacement of aneurysmal segment of ascending aorta by anastomosis of aorta to aorta NEC          |
| Thoracic aortic aneurysm | include | OPCS4 | L19.2 Replacement of aneurysmal segment of thoracic aorta by anastomosis of aorta to aorta NEC           |

|                          |         |       |                                                                                           |
|--------------------------|---------|-------|-------------------------------------------------------------------------------------------|
| Thoracic aortic aneurysm | include | OPCS4 | L20.1 Emergency bypass of segment of ascending aorta by anastomosis of aorta to aorta NEC |
| Thoracic aortic aneurysm | include | OPCS4 | L21.1 Bypass of segment of ascending aorta by anastomosis of aorta to aorta NEC           |
| Thoracic aortic aneurysm | include | OPCS4 | L27.3 Endovascular insertion of stent graft for thoracic aortic aneurysm                  |
| Thoracic aortic aneurysm | include | OPCS4 | L28.3 Endovascular insertion of stent for thoracic aortic aneurysm                        |

**Supplemental Table 2: Significant Associations**

| <b>Trait</b> | <b>SNP</b>  | <b>CHR</b> | <b>BP</b>     | <b>Effect/<br/>Non-<br/>effect<br/>allele</b> | <b>Closest<br/>gene</b> | <b>P</b> | <b>Previo<br/>us<br/>work</b> |
|--------------|-------------|------------|---------------|-----------------------------------------------|-------------------------|----------|-------------------------------|
| Aorta 5      | rs824510    | 2          | 19725556      | G/A                                           | OSR1                    | 1.14E-13 | Pirrucc<br>ello et<br>al.     |
| Aorta 5      | rs369488034 | 3          | 58129020      | GA/G                                          | FLNB                    | 2.88E-08 | Pirrucc<br>ello et<br>al.     |
| Aorta 5      | rs67846163  | 4          | 17465688<br>9 | A/G                                           | HAND2                   | 3.01E-09 | Pirrucc<br>ello et<br>al.     |
| Aorta 5      | rs4635954   | 5          | 95607323      | T/G                                           | PCSK1                   | 5.88E-13 | Pirrucc<br>ello et<br>al.     |
| Aorta 5      | rs5880559   | 6          | 14359300<br>3 | A/AG                                          | AIG1                    | 9.31E-10 | Pirrucc<br>ello et<br>al.     |

|         |                     |    |               |      |       |          |                           |
|---------|---------------------|----|---------------|------|-------|----------|---------------------------|
| Aorta 5 | rs6460069           | 7  | 73430120      | A/T  | ELN   | 4.80E-17 | Pirrucc<br>ello et<br>al. |
| Aorta 5 | rs11618858          | 13 | 22869283      | T/C  | FGF9  | 4.63E-11 | Pirrucc<br>ello et<br>al. |
| Aorta 5 | rs62053262          | 16 | 69969299      | C/G  | WWP2  | 1.17E-11 | Pirrucc<br>ello et<br>al. |
| Aorta 4 | rs1863777           | 2  | 19729131      | T/C  | OSR1  | 1.73E-24 | Pirrucc<br>ello et<br>al. |
| Aorta 4 | rs35930173          | 2  | 16492433<br>2 | G/A  | FIGN  | 3.48E-08 | Pirrucc<br>ello et<br>al. |
| Aorta 4 | 3:58133803_<br>AT_A | 3  | 58133803      | AT/A | FLNB  | 1.86E-11 | Pirrucc<br>ello et<br>al. |
| Aorta 4 | rs34266187          | 3  | 12397530<br>1 | G/A  | KALRN | 1.25E-09 | novel                     |

|         |                     |   |               |      |       |          |                           |
|---------|---------------------|---|---------------|------|-------|----------|---------------------------|
| Aorta 4 | rs55914222          | 3 | 12820294<br>3 | G/C  | GATA2 | 2.22E-12 | Pirrucc<br>ello et<br>al. |
| Aorta 4 | 4:81170475_<br>CT_C | 4 | 81170475      | CT/C | FGF5  | 2.74E-08 | Pirrucc<br>ello et<br>al. |
| Aorta 4 | rs67846163          | 4 | 17465688<br>9 | A/G  | HAND2 | 4.11E-14 | Pirrucc<br>ello et<br>al. |
| Aorta 4 | rs4077816           | 5 | 95582494      | A/G  | PCSK1 | 9.48E-24 | Pirrucc<br>ello et<br>al. |
| Aorta 4 | rs335196            | 5 | 12252053<br>1 | G/A  | PRDM6 | 8.21E-10 | Pirrucc<br>ello et<br>al. |
| Aorta 4 | rs1630736           | 6 | 12295987      | C/T  | EDN1  | 1.99E-10 | Pirrucc<br>ello et<br>al. |
| Aorta 4 | rs1570350           | 6 | 14359238<br>6 | A/G  | AIG1  | 9.41E-12 | Pirrucc<br>ello et        |

|         |             |    |               |      |            |          |                           |
|---------|-------------|----|---------------|------|------------|----------|---------------------------|
|         |             |    |               |      |            |          | al.                       |
| Aorta 4 | rs79215950  | 7  | 35277067      | G/A  | TBX20      | 9.66E-12 | Pirrucc<br>ello et<br>al. |
| Aorta 4 | rs4717863   | 7  | 73428879      | C/T  | ELN        | 1.71E-27 | Pirrucc<br>ello et<br>al. |
| Aorta 4 | rs771025673 | 7  | 85045118      | AT/A | SEMA3<br>D | 6.30E-13 | Pirrucc<br>ello et<br>al. |
| Aorta 4 | rs16876090  | 8  | 10836359<br>6 | G/A  | ANGPT<br>1 | 1.14E-08 | Pirrucc<br>ello et<br>al. |
| Aorta 4 | rs34557926  | 8  | 12460715<br>9 | C/T  | KLHL38     | 6.25E-13 | Pirrucc<br>ello et<br>al. |
| Aorta 4 | rs77218185  | 10 | 96071212      | T/C  | PLCE1      | 4.15E-08 | Pirrucc<br>ello et<br>al. |
| Aorta 4 | rs34943800  | 10 | 11448769      | C/T  | VTI1A      | 3.48E-09 | Pirrucc                   |

|         |            |    |           |     |         |          |                    |
|---------|------------|----|-----------|-----|---------|----------|--------------------|
|         |            |    | 7         |     |         |          | ello et al.        |
| Aorta 4 | rs77889556 | 11 | 17498057  | G/A | ABCC8   | 6.51E-09 | Pirruccello et al. |
| Aorta 4 | rs273582   | 11 | 30890857  | C/T | DCDC1   | 4.54E-08 | Pirruccello et al. |
| Aorta 4 | rs11222084 | 11 | 130273230 | A/T | ADAMTS8 | 1.19E-09 | Pirruccello et al. |
| Aorta 4 | rs2307024  | 12 | 22005003  | T/G | ABCC9   | 5.00E-10 | Pirruccello et al. |
| Aorta 4 | rs12869493 | 13 | 22872349  | C/T | FGF9    | 5.34E-17 | Pirruccello et al. |
| Aorta 4 | rs4905134  | 14 | 94459845  | A/G | ASB2    | 1.55E-09 | Pirruccello et al. |

|         |             |    |          |      |             |          |                           |
|---------|-------------|----|----------|------|-------------|----------|---------------------------|
| Aorta 4 | rs62053262  | 16 | 69969299 | C/G  | WWP2        | 4.36E-19 | Pirrucc<br>ello et<br>al. |
| Aorta 4 | rs112648265 | 16 | 88990551 | T/TG | CBFA2<br>T3 | 3.64E-11 | Pirrucc<br>ello et<br>al. |
| Aorta 4 | rs7213756   | 17 | 2098339  | C/A  | SMG6        | 8.30E-14 | Pirrucc<br>ello et<br>al. |
| Aorta 4 | rs7215383   | 17 | 12182246 | A/G  | MAP2K<br>4  | 9.34E-10 | Pirrucc<br>ello et<br>al. |
| Aorta 4 | rs4821942   | 22 | 40718100 | G/A  | TNRC6<br>B  | 7.36E-11 | Pirrucc<br>ello et<br>al. |
| Aorta 3 | rs17535443  | 1  | 59646056 | G/A  | FGGY        | 1.70E-08 | Pirrucc<br>ello et<br>al. |
| Aorta 3 | rs116595383 | 2  | 19711073 | C/A  | OSR1        | 2.42E-24 | Pirrucc<br>ello et        |



|         |             |   |               |            |            |          |                           |
|---------|-------------|---|---------------|------------|------------|----------|---------------------------|
|         |             |   |               |            |            |          | al.                       |
| Aorta 3 | rs16849225  | 2 | 16490682<br>0 | C/T        | FIGN       | 3.64E-09 | Pirrucc<br>ello et<br>al. |
| Aorta 3 | rs12052878  | 2 | 23822759<br>4 | G/A        | COL6A<br>3 | 1.22E-10 | Pirrucc<br>ello et<br>al. |
| Aorta 3 | rs5848609   | 3 | 41802815      | G/GTT<br>A | ULK4       | 6.49E-09 | Pirrucc<br>ello et<br>al. |
| Aorta 3 | rs11710658  | 3 | 58147888      | G/A        | FLNB       | 8.63E-14 | Pirrucc<br>ello et<br>al. |
| Aorta 3 | rs62270945  | 3 | 12820188<br>9 | C/T        | GATA2      | 1.78E-09 | Pirrucc<br>ello et<br>al. |
| Aorta 3 | rs67846163  | 4 | 17465688<br>9 | A/G        | HAND2      | 8.58E-13 | Pirrucc<br>ello et<br>al. |
| Aorta 3 | rs764443335 | 5 | 95606712      | AATG       | PCSK1      | 7.97E-29 | Pirrucc                   |

|         |            |   |               |     |              |          |                    |
|---------|------------|---|---------------|-----|--------------|----------|--------------------|
|         |            |   |               | /A  |              |          | ello et al.        |
| Aorta 3 | rs17470137 | 5 | 12253134<br>7 | G/A | PRDM6        | 2.48E-15 | Pirruccello et al. |
| Aorta 3 | rs496236   | 6 | 11641601      | A/G | TMEM1<br>70B | 1.26E-08 | Pirruccello et al. |
| Aorta 3 | rs1630736  | 6 | 12295987      | C/T | EDN1         | 5.94E-12 | Pirruccello et al. |
| Aorta 3 | rs9470366  | 6 | 36625562      | G/A | CDKN1<br>A   | 2.43E-09 | Pirruccello et al. |
| Aorta 3 | rs6907215  | 6 | 14360896<br>8 | C/T | AIG1         | 2.37E-12 | Pirruccello et al. |
| Aorta 3 | rs1362207  | 7 | 35282435      | T/A | TBX20        | 2.42E-11 | Pirruccello et al. |

|         |            |    |               |            |             |          |                           |
|---------|------------|----|---------------|------------|-------------|----------|---------------------------|
| Aorta 3 | rs6943980  | 7  | 73424373      | A/C        | ELN         | 7.04E-49 | Pirrucc<br>ello et<br>al. |
| Aorta 3 | rs1583081  | 7  | 85034227      | G/T        | SEMA3<br>D  | 2.87E-18 | Pirrucc<br>ello et<br>al. |
| Aorta 3 | rs7845785  | 8  | 10829414<br>4 | C/T        | ANGPT<br>1  | 3.34E-10 | Pirrucc<br>ello et<br>al. |
| Aorta 3 | rs7006122  | 8  | 12460861<br>4 | T/G        | KLHL38      | 1.46E-13 | Pirrucc<br>ello et<br>al. |
| Aorta 3 | rs71463528 | 10 | 65344190      | T/TAA<br>A | REEP3       | 7.34E-09 | Pirrucc<br>ello et<br>al. |
| Aorta 3 | rs12785061 | 10 | 96264077      | T/C        | TBC1D<br>12 | 4.34E-10 | Pirrucc<br>ello et<br>al. |
| Aorta 3 | rs55646508 | 11 | 69819638      | C/T        | ANO1        | 3.14E-11 | Pirrucc<br>ello et        |

|         |            |    |          |     |       |          |                           |
|---------|------------|----|----------|-----|-------|----------|---------------------------|
|         |            |    |          |     |       |          | al.                       |
| Aorta 3 | rs2307024  | 12 | 22005003 | T/G | ABCC9 | 1.31E-11 | Pirrucc<br>ello et<br>al. |
| Aorta 3 | rs1507721  | 13 | 22884524 | C/T | FGF9  | 3.19E-23 | Pirrucc<br>ello et<br>al. |
| Aorta 3 | rs4905134  | 14 | 94459845 | A/G | ASB2  | 1.26E-08 | Pirrucc<br>ello et<br>al. |
| Aorta 3 | rs11853359 | 15 | 71621524 | G/A | THSD4 | 2.41E-10 | Pirrucc<br>ello et<br>al. |
| Aorta 3 | rs12708958 | 16 | 56089862 | C/T | CES5A | 1.78E-08 | Pirrucc<br>ello et<br>al. |
| Aorta 3 | rs62053262 | 16 | 69969299 | C/G | WWP2  | 8.80E-25 | Pirrucc<br>ello et<br>al. |
| Aorta 3 | rs533679   | 16 | 88991500 | A/G | CBFA2 | 9.36E-13 | Pirrucc                   |

|         |             |    |               |             |        |          |                    |
|---------|-------------|----|---------------|-------------|--------|----------|--------------------|
|         |             |    |               |             | T3     |          | ello et al.        |
| Aorta 3 | rs1532292   | 17 | 2097483       | T/G         | SMG6   | 1.04E-16 | Pirruccello et al. |
| Aorta 3 | rs4791495   | 17 | 12190157      | G/A         | MAP2K4 | 2.42E-14 | Pirruccello et al. |
| Aorta 3 | rs3063286   | 20 | 10488552      | T/TTA       | SLX4IP | 1.23E-08 | Pirruccello et al. |
| Aorta 2 | rs17535443  | 1  | 59646056      | G/A         | FGGY   | 4.44E-08 | Pirruccello et al. |
| Aorta 2 | rs824510    | 2  | 19725556      | G/A         | OSR1   | 1.86E-21 | Pirruccello et al. |
| Aorta 2 | rs760787102 | 2  | 16489121<br>3 | ATAT<br>T/A | FIGN   | 9.53E-11 | Pirruccello et al. |

|         |            |   |               |     |              |          |                           |
|---------|------------|---|---------------|-----|--------------|----------|---------------------------|
| Aorta 2 | rs12052878 | 2 | 23822759<br>4 | G/A | COL6A<br>3   | 9.92E-12 | Pirrucc<br>ello et<br>al. |
| Aorta 2 | rs73028182 | 3 | 14863636      | A/G | FGD5         | 1.53E-11 | Pirrucc<br>ello et<br>al. |
| Aorta 2 | rs6794074  | 3 | 41751147      | A/G | ULK4         | 1.51E-10 | Pirrucc<br>ello et<br>al. |
| Aorta 2 | rs13095822 | 3 | 58131979      | C/T | FLNB         | 4.72E-15 | Pirrucc<br>ello et<br>al. |
| Aorta 2 | rs2306272  | 3 | 66434643      | T/C | SLC25A<br>26 | 2.76E-08 | Pirrucc<br>ello et<br>al. |
| Aorta 2 | rs62270945 | 3 | 12820188<br>9 | C/T | GATA2        | 2.51E-11 | Pirrucc<br>ello et<br>al. |
| Aorta 2 | rs67846163 | 4 | 17465688<br>9 | A/G | HAND2        | 5.65E-13 | Pirrucc<br>ello et        |

|         |                      |   |               |      |              |          |                           |
|---------|----------------------|---|---------------|------|--------------|----------|---------------------------|
|         |                      |   |               |      |              |          | al.                       |
| Aorta 2 | rs540082300          | 5 | 51196504      | C/CT | ISL1         | 2.83E-08 | novel                     |
| Aorta 2 | rs55745974           | 5 | 95566562      | A/T  | PCSK1        | 9.34E-42 | Pirrucc<br>ello et<br>al. |
| Aorta 2 | rs17470137           | 5 | 12253134<br>7 | G/A  | PRDM6        | 9.89E-18 | Pirrucc<br>ello et<br>al. |
| Aorta 2 | 5:173276788<br>_AT_A | 5 | 17327678<br>8 | AT/A | CPEB4        | 8.21E-10 | novel                     |
| Aorta 2 | rs496236             | 6 | 11641601      | A/G  | TMEM1<br>70B | 1.23E-09 | Pirrucc<br>ello et<br>al. |
| Aorta 2 | rs1630736            | 6 | 12295987      | C/T  | EDN1         | 9.59E-16 | Pirrucc<br>ello et<br>al. |
| Aorta 2 | rs12199346           | 6 | 36641546      | C/A  | CDKN1<br>A   | 7.14E-09 | Pirrucc<br>ello et<br>al. |

|         |                      |   |               |      |            |          |                           |
|---------|----------------------|---|---------------|------|------------|----------|---------------------------|
| Aorta 2 | rs12195791           | 6 | 72205132      | G/A  | OGFRL<br>1 | 7.64E-09 | novel                     |
| Aorta 2 | rs1570350            | 6 | 14359238<br>6 | A/G  | AIG1       | 2.50E-13 | Pirrucc<br>ello et<br>al. |
| Aorta 2 | rs13203975           | 6 | 15233310<br>4 | G/A  | ESR1       | 3.88E-11 | Pirrucc<br>ello et<br>al. |
| Aorta 2 | rs79215950           | 7 | 35277067      | G/A  | TBX20      | 1.44E-12 | Pirrucc<br>ello et<br>al. |
| Aorta 2 | rs6974735            | 7 | 73428222      | A/G  | ELN        | 4.24E-46 | Pirrucc<br>ello et<br>al. |
| Aorta 2 | rs771025673          | 7 | 85045118      | AT/A | SEMA3<br>D | 1.98E-22 | Pirrucc<br>ello et<br>al. |
| Aorta 2 | 8:122634926<br>_CA_C | 8 | 12263492<br>6 | CA/C | HAS2       | 1.62E-11 | Pirrucc<br>ello et<br>al. |



|         |             |    |               |      |            |          |                           |
|---------|-------------|----|---------------|------|------------|----------|---------------------------|
| Aorta 2 | rs6470156   | 8  | 12457998<br>5 | G/A  | FBXO3<br>2 | 4.72E-14 | Pirrucc<br>ello et<br>al. |
| Aorta 2 | rs10995020  | 10 | 63816077      | C/G  | ARID5B     | 2.76E-09 | Pirrucc<br>ello et<br>al. |
| Aorta 2 | rs77218185  | 10 | 96071212      | T/C  | PLCE1      | 5.95E-14 | Pirrucc<br>ello et<br>al. |
| Aorta 2 | rs146473682 | 11 | 30875859      | CT/C | DCDC1      | 3.92E-09 | Pirrucc<br>ello et<br>al. |
| Aorta 2 | rs55646508  | 11 | 69819638      | C/T  | ANO1       | 1.30E-11 | Pirrucc<br>ello et<br>al. |
| Aorta 2 | rs2307024   | 12 | 22005003      | T/G  | ABCC9      | 1.52E-13 | Pirrucc<br>ello et<br>al. |
| Aorta 2 | rs56298756  | 12 | 62777565      | G/T  | USP15      | 6.28E-10 | Pirrucc<br>ello et        |

|         |                        |    |          |            |       |          |                           |
|---------|------------------------|----|----------|------------|-------|----------|---------------------------|
|         |                        |    |          |            |       |          | al.                       |
| Aorta 2 | rs2137537              | 12 | 71113087 | T/C        | PTPRR | 8.19E-12 | novel                     |
| Aorta 2 | rs9506822              | 13 | 22862220 | A/G        | FGF9  | 9.39E-36 | Pirrucc<br>ello et<br>al. |
| Aorta 2 | rs2740515              | 13 | 50760310 | G/C        | DLEU1 | 4.21E-08 | Pirrucc<br>ello et<br>al. |
| Aorta 2 | rs1848050              | 15 | 48862043 | G/A        | FBN1  | 5.56E-10 | Pirrucc<br>ello et<br>al. |
| Aorta 2 | rs6494904              | 15 | 71609522 | G/A        | THSD4 | 5.62E-15 | Pirrucc<br>ello et<br>al. |
| Aorta 2 | 16:56221642<br>_AAAT_A | 16 | 56221642 | AAAT<br>/A | GNAO1 | 1.25E-09 | Pirrucc<br>ello et<br>al. |
| Aorta 2 | rs62053262             | 16 | 69969299 | C/G        | WWP2  | 3.55E-22 | Pirrucc<br>ello et<br>al. |

|         |             |    |          |             |             |          |                           |
|---------|-------------|----|----------|-------------|-------------|----------|---------------------------|
| Aorta 2 | rs7500448   | 16 | 83045790 | A/G         | CDH13       | 1.23E-12 | Pirrucc<br>ello et<br>al. |
| Aorta 2 | rs11862605  | 16 | 89029267 | A/G         | CBFA2<br>T3 | 4.84E-15 | Pirrucc<br>ello et<br>al. |
| Aorta 2 | rs7213756   | 17 | 2098339  | C/A         | SMG6        | 6.78E-20 | Pirrucc<br>ello et<br>al. |
| Aorta 2 | rs7221449   | 17 | 12191884 | C/T         | MAP2K<br>4  | 3.93E-18 | Pirrucc<br>ello et<br>al. |
| Aorta 2 | rs3063286   | 20 | 10488552 | T/TTA       | SLX4IP      | 6.50E-11 | Pirrucc<br>ello et<br>al. |
| Aorta 2 | rs147036721 | 22 | 40547564 | G/GA<br>AAA | TNRC6<br>B  | 9.34E-09 | Pirrucc<br>ello et<br>al. |
| Aorta 1 | rs747347287 | 1  | 45418228 | AT/A        | EIF2B3      | 7.73E-09 | novel                     |
| Aorta 1 | rs824510    | 2  | 19725556 | G/A         | OSR1        | 6.73E-23 | Pirrucc                   |

|         |                     |   |               |             |              |          |                    |
|---------|---------------------|---|---------------|-------------|--------------|----------|--------------------|
|         |                     |   |               |             |              |          | ello et al.        |
| Aorta 1 | rs760787102         | 2 | 16489121<br>3 | ATAT<br>T/A | FIGN         | 4.75E-12 | Pirruccello et al. |
| Aorta 1 | rs12052878          | 2 | 23822759<br>4 | G/A         | COL6A<br>3   | 3.78E-11 | Pirruccello et al. |
| Aorta 1 | rs73028182          | 3 | 14863636      | A/G         | FGD5         | 1.03E-10 | Pirruccello et al. |
| Aorta 1 | rs5848609           | 3 | 41802815      | G/GTT<br>A  | ULK4         | 5.31E-09 | Pirruccello et al. |
| Aorta 1 | 3:58133803_<br>AT_A | 3 | 58133803      | AT/A        | FLNB         | 4.27E-15 | Pirruccello et al. |
| Aorta 1 | rs2306272           | 3 | 66434643      | T/C         | SLC25A<br>26 | 3.25E-08 | Pirruccello et al. |

|         |            |   |               |     |        |          |                           |
|---------|------------|---|---------------|-----|--------|----------|---------------------------|
| Aorta 1 | rs62270945 | 3 | 12820188<br>9 | C/T | GATA2  | 9.71E-09 | Pirrucc<br>ello et<br>al. |
| Aorta 1 | rs1979974  | 4 | 14680081<br>5 | A/G | ZNF827 | 9.39E-09 | novel                     |
| Aorta 1 | rs67846163 | 4 | 17465688<br>9 | A/G | HAND2  | 1.05E-08 | Pirrucc<br>ello et<br>al. |
| Aorta 1 | rs13158444 | 5 | 51201361      | T/C | ISL1   | 2.95E-09 | novel                     |
| Aorta 1 | rs55745974 | 5 | 95566562      | A/T | PCSK1  | 2.48E-33 | Pirrucc<br>ello et<br>al. |
| Aorta 1 | rs335196   | 5 | 12252053<br>1 | G/A | PRDM6  | 9.21E-21 | Pirrucc<br>ello et<br>al. |
| Aorta 1 | rs62376928 | 5 | 17328814<br>6 | T/C | CPEB4  | 2.67E-10 | novel                     |
| Aorta 1 | rs2070699  | 6 | 12292772      | G/T | EDN1   | 7.28E-14 | Pirrucc<br>ello et<br>al. |

|         |             |   |               |      |             |          |                           |
|---------|-------------|---|---------------|------|-------------|----------|---------------------------|
| Aorta 1 | rs143917622 | 6 | 72205158      | A/AT | OGFRL<br>1  | 7.80E-09 | novel                     |
| Aorta 1 | rs6941056   | 6 | 14359182<br>1 | C/G  | AIG1        | 2.58E-08 | Pirrucc<br>ello et<br>al. |
| Aorta 1 | rs2207231   | 6 | 15232988<br>4 | A/G  | ESR1        | 3.84E-11 | Pirrucc<br>ello et<br>al. |
| Aorta 1 | rs6974735   | 7 | 73428222      | A/G  | ELN         | 2.94E-41 | Pirrucc<br>ello et<br>al. |
| Aorta 1 | rs771025673 | 7 | 85045118      | AT/A | SEMA3<br>D  | 3.08E-11 | Pirrucc<br>ello et<br>al. |
| Aorta 1 | rs112621658 | 8 | 38774696      | C/A  | PLEKH<br>A2 | 4.70E-10 | novel                     |
| Aorta 1 | rs9721183   | 8 | 75781818      | C/T  | PI15        | 3.63E-08 | Pirrucc<br>ello et<br>al. |
| Aorta 1 | rs10089014  | 8 | 12263576      | C/T  | HAS2        | 5.99E-11 | Pirrucc                   |

|         |             |    |               |      |             |          |                    |
|---------|-------------|----|---------------|------|-------------|----------|--------------------|
|         |             |    | 7             |      |             |          | ello et al.        |
| Aorta 1 | rs6470156   | 8  | 12457998<br>5 | G/A  | FBXO3<br>2  | 2.89E-11 | Pirruccello et al. |
| Aorta 1 | rs40430     | 10 | 79179345      | A/T  | KCNM<br>A1  | 1.88E-10 | novel              |
| Aorta 1 | rs1343094   | 10 | 95900635      | T/A  | PLCE1       | 1.29E-14 | Pirruccello et al. |
| Aorta 1 | rs146473682 | 11 | 30875859      | CT/C | DCDC1       | 8.65E-10 | Pirruccello et al. |
| Aorta 1 | rs55646508  | 11 | 69819638      | C/T  | ANO1        | 5.15E-12 | Pirruccello et al. |
| Aorta 1 | rs11222084  | 11 | 13027323<br>0 | A/T  | ADAMT<br>S8 | 1.36E-11 | Pirruccello et al. |
| Aorta 1 | rs10743356  | 12 | 20235039      | A/G  | PDE3A       | 2.92E-11 | novel              |

|         |             |    |          |      |       |          |                           |
|---------|-------------|----|----------|------|-------|----------|---------------------------|
| Aorta 1 | rs2307024   | 12 | 22005003 | T/G  | ABCC9 | 1.21E-14 | Pirrucc<br>ello et<br>al. |
| Aorta 1 | rs7304603   | 12 | 71114400 | T/C  | PTPRR | 3.78E-13 | novel                     |
| Aorta 1 | rs4144503   | 12 | 94141772 | T/A  | CRADD | 3.83E-08 | Pirrucc<br>ello et<br>al. |
| Aorta 1 | rs7994761   | 13 | 22871446 | A/G  | FGF9  | 1.14E-30 | Pirrucc<br>ello et<br>al. |
| Aorta 1 | rs2740515   | 13 | 50760310 | G/C  | DLEU1 | 2.24E-09 | Pirrucc<br>ello et<br>al. |
| Aorta 1 | rs1848050   | 15 | 48862043 | G/A  | FBN1  | 3.12E-16 | Pirrucc<br>ello et<br>al. |
| Aorta 1 | rs1441358   | 15 | 71612514 | T/G  | THSD4 | 6.02E-14 | Pirrucc<br>ello et<br>al. |
| Aorta 1 | 16:14505488 | 16 | 14505488 | CT/C | PARN  | 1.36E-09 | novel                     |



|         | _CT_C      |    |          |     |             |          |                           |
|---------|------------|----|----------|-----|-------------|----------|---------------------------|
| Aorta 1 | rs62053262 | 16 | 69969299 | C/G | WWP2        | 4.16E-12 | Pirrucc<br>ello et<br>al. |
| Aorta 1 | rs7500448  | 16 | 83045790 | A/G | CDH13       | 3.95E-15 | Pirrucc<br>ello et<br>al. |
| Aorta 1 | rs488327   | 16 | 88989005 | T/C | CBFA2<br>T3 | 3.95E-11 | Pirrucc<br>ello et<br>al. |
| Aorta 1 | rs1002135  | 17 | 2097583  | T/G | SMG6        | 4.34E-26 | Pirrucc<br>ello et<br>al. |
| Aorta 1 | rs7221449  | 17 | 12191884 | C/T | MAP2K<br>4  | 7.08E-15 | Pirrucc<br>ello et<br>al. |
| Aorta 1 | rs35296742 | 17 | 40999303 | G/A | AOC2        | 4.41E-08 | novel                     |
| Aorta 1 | rs264282   | 18 | 10917258 | A/G | PIEZO2      | 8.01E-09 | Pirrucc<br>ello et<br>al. |

|         |             |    |               |            |             |          |                           |
|---------|-------------|----|---------------|------------|-------------|----------|---------------------------|
| Aorta 1 | rs3063286   | 20 | 10488552      | T/TTA      | SLX4IP      | 9.05E-12 | Pirrucc<br>ello et<br>al. |
| Aorta 1 | rs6035357   | 20 | 19478696      | C/T        | SLC24A<br>3 | 7.18E-10 | Pirrucc<br>ello et<br>al. |
| Aorta 1 | rs4821942   | 22 | 40718100      | G/A        | TNRC6<br>B  | 2.30E-09 | Pirrucc<br>ello et<br>al. |
| Aorta 0 | rs824510    | 2  | 19725556      | G/A        | OSR1        | 2.17E-22 | Pirrucc<br>ello et<br>al. |
| Aorta 0 | rs9869210   | 3  | 58130276      | G/C        | FLNB        | 1.63E-10 | Pirrucc<br>ello et<br>al. |
| Aorta 0 | rs188848834 | 4  | 17468150<br>1 | C/T        | HAND2       | 4.91E-10 | Pirrucc<br>ello et<br>al. |
| Aorta 0 | rs764443335 | 5  | 95606712      | AATG<br>/A | PCSK1       | 7.83E-19 | Pirrucc<br>ello et        |

|         |                      |    |               |      |             |          |                           |
|---------|----------------------|----|---------------|------|-------------|----------|---------------------------|
|         |                      |    |               |      |             |          | al.                       |
| Aorta 0 | rs7734507            | 5  | 12260589<br>6 | C/T  | CEP120      | 2.11E-17 | Pirrucc<br>ello et<br>al. |
| Aorta 0 | rs2070699            | 6  | 12292772      | G/T  | EDN1        | 1.09E-11 | Pirrucc<br>ello et<br>al. |
| Aorta 0 | 6:152379347<br>_TA_T | 6  | 15237934<br>7 | TA/T | ESR1        | 3.56E-10 | Pirrucc<br>ello et<br>al. |
| Aorta 0 | rs917275             | 7  | 28658522      | A/G  | CREB5       | 2.91E-08 | novel                     |
| Aorta 0 | rs4717863            | 7  | 73428879      | C/T  | ELN         | 4.99E-22 | Pirrucc<br>ello et<br>al. |
| Aorta 0 | rs112621658          | 8  | 38774696      | C/A  | PLEKH<br>A2 | 5.52E-10 | novel                     |
| Aorta 0 | rs40430              | 10 | 79179345      | A/T  | KCNM<br>A1  | 4.34E-10 | novel                     |
| Aorta 0 | rs1343094            | 10 | 95900635      | T/A  | PLCE1       | 1.03E-11 | Pirrucc                   |

|         |             |    |               |     |             |          |                    |
|---------|-------------|----|---------------|-----|-------------|----------|--------------------|
|         |             |    |               |     |             |          | ello et al.        |
| Aorta 0 | rs112807178 | 11 | 69822783      | G/A | ANO1        | 1.40E-12 | Pirruccello et al. |
| Aorta 0 | rs11222084  | 11 | 13027323<br>0 | A/T | ADAMT<br>S8 | 1.25E-10 | Pirruccello et al. |
| Aorta 0 | rs10841441  | 12 | 20210632      | C/T | PDE3A       | 4.54E-17 | novel              |
| Aorta 0 | rs861202    | 12 | 21994955      | G/C | ABCC9       | 5.13E-11 | Pirruccello et al. |
| Aorta 0 | rs2137537   | 12 | 71113087      | T/C | PTPRR       | 1.57E-10 | novel              |
| Aorta 0 | rs35715048  | 12 | 94200555      | G/A | CRADD       | 1.16E-08 | Pirruccello et al. |
| Aorta 0 | rs9316871   | 13 | 22861921      | A/G | FGF9        | 7.99E-19 | Pirruccello et al. |

|         |            |    |          |     |            |          |                           |
|---------|------------|----|----------|-----|------------|----------|---------------------------|
| Aorta 0 | rs2687939  | 13 | 50760323 | A/G | DLEU1      | 1.43E-11 | Pirrucc<br>ello et<br>al. |
| Aorta 0 | rs1036477  | 15 | 48914926 | A/G | FBN1       | 4.09E-12 | Pirrucc<br>ello et<br>al. |
| Aorta 0 | rs6494904  | 15 | 71609522 | G/A | THSD4      | 1.51E-08 | Pirrucc<br>ello et<br>al. |
| Aorta 0 | rs7500448  | 16 | 83045790 | A/G | CDH13      | 6.87E-11 | Pirrucc<br>ello et<br>al. |
| Aorta 0 | rs1532292  | 17 | 2097483  | T/G | SMG6       | 3.81E-26 | Pirrucc<br>ello et<br>al. |
| Aorta 0 | rs7221449  | 17 | 12191884 | C/T | MAP2K<br>4 | 6.07E-10 | Pirrucc<br>ello et<br>al. |
| Aorta 0 | rs78033733 | 17 | 45290078 | T/G | MYL4       | 8.66E-09 | novel                     |
| Aorta 0 | rs57785785 | 19 | 58815158 | T/A | ZNF8       | 1.08E-08 | novel                     |

|                |                        |    |               |             |             |          |                           |
|----------------|------------------------|----|---------------|-------------|-------------|----------|---------------------------|
| Aorta 0        | rs147036721            | 22 | 40547564      | G/GA<br>AAA | TNRC6<br>B  | 7.67E-09 | Pirrucc<br>ello et<br>al. |
| Aortic<br>root | rs76947392             | 1  | 1256608       | G/A         | CPSF3L      | 2.19E-08 | novel                     |
| Aortic<br>root | rs12733512             | 1  | 59646978      | C/T         | FGGY        | 4.02E-10 | Wild et<br>al.            |
| Aortic<br>root | 1:100033312<br>_TA_T   | 1  | 10003331<br>2 | TA/T        | PALMD       | 8.96E-25 | Wild et<br>al.            |
| Aortic<br>root | rs1285677              | 1  | 23271235<br>5 | A/C         | SIPA1L<br>2 | 7.20E-13 | novel                     |
| Aortic<br>root | rs2686630              | 3  | 58091861      | G/C         | FLNB        | 3.20E-09 | novel                     |
| Aortic<br>root | rs73030346             | 3  | 16931785<br>6 | C/T         | MECO<br>M   | 3.54E-08 | novel                     |
| Aortic<br>root | rs13134800             | 4  | 12090028<br>2 | T/C         | MAD2L<br>1  | 4.61E-10 | novel                     |
| Aortic<br>root | 5:15005465_<br>CTCTT_C | 5  | 15005465      | CTCT<br>T/C | ANKH        | 2.68E-08 | novel                     |

|             |            |    |               |     |            |          |             |
|-------------|------------|----|---------------|-----|------------|----------|-------------|
| Aortic root | rs4264961  | 5  | 95617018      | C/T | PCSK1      | 3.15E-10 | novel       |
| Aortic root | rs77097530 | 5  | 12260985<br>3 | C/G | CEP120     | 1.99E-12 | Wild et al. |
| Aortic root | rs1630736  | 6  | 12295987      | C/T | EDN1       | 9.69E-11 | novel       |
| Aortic root | rs80036911 | 6  | 16472975      | C/T | ATXN1      | 1.63E-08 | novel       |
| Aortic root | rs7754762  | 6  | 15231153<br>7 | T/A | ESR1       | 3.06E-09 | novel       |
| Aortic root | rs28735    | 10 | 79178044      | G/C | KCNM<br>A1 | 2.80E-11 | novel       |
| Aortic root | rs1977289  | 10 | 96301907      | T/C | HELLS      | 2.63E-10 | novel       |
| Aortic root | rs72931748 | 11 | 69825414      | A/G | ANO1       | 1.14E-11 | Wild et al. |
| Aortic root | rs12280388 | 11 | 12167071<br>2 | T/C | SORL1      | 2.48E-12 | novel       |
| Aortic root | rs4765663  | 12 | 2178760       | G/C | CACNA      | 3.79E-08 | Wild et     |

|                |                         |    |          |            |       |          |                |
|----------------|-------------------------|----|----------|------------|-------|----------|----------------|
| root           |                         |    |          |            | 1C    |          | al.            |
| Aortic<br>root | rs10770612              | 12 | 20230639 | A/G        | PDE3A | 5.71E-25 | Wild et<br>al. |
| Aortic<br>root | rs4296081               | 12 | 22005781 | A/G        | ABCC9 | 1.94E-10 | novel          |
| Aortic<br>root | 12:66404136<br>_AAAAC_A | 12 | 66404136 | AAA<br>C/A | HMGA2 | 6.99E-13 | Wild et<br>al. |
| Aortic<br>root | rs903175                | 12 | 94158719 | G/A        | CRADD | 2.73E-10 | novel          |
| Aortic<br>root | rs12866004              | 13 | 22865917 | T/A        | FGF9  | 5.20E-16 | novel          |
| Aortic<br>root | rs2740515               | 13 | 50760310 | G/C        | DLEU1 | 9.97E-28 | Wild et<br>al. |
| Aortic<br>root | rs17352842              | 15 | 48694211 | C/T        | FBN1  | 1.93E-08 | novel          |
| Aortic<br>root | rs139939693             | 15 | 63859576 | C/T        | USP3  | 3.40E-10 | Wild et<br>al. |
| Aortic<br>root | rs1002135               | 17 | 2097583  | T/G        | SMG6  | 1.61E-20 | Wild et<br>al. |



|             |            |    |          |     |          |          |             |
|-------------|------------|----|----------|-----|----------|----------|-------------|
| Aortic root | rs17677363 | 17 | 45036112 | A/T | GOSR2    | 2.99E-22 | Wild et al. |
| LVOT        | rs35631249 | 4  | 73443865 | C/A | ADAMT S3 | 3.28E-08 | novel       |
| LVOT        | rs7139226  | 12 | 20180749 | C/T | AEBP2    | 9.36E-11 | novel       |
| LVOT        | rs10400419 | 12 | 66389968 | T/C | HMGA2    | 7.77E-10 | novel       |
| LVOT        | rs2740516  | 13 | 50761619 | G/A | DLEU1    | 2.27E-09 | novel       |
| LVOT        | rs17677363 | 17 | 45036112 | A/T | GOSR2    | 4.11E-19 | novel       |
| LVOT        | rs62240962 | 22 | 42259524 | C/T | SREBF2   | 9.75E-09 | novel       |

**Supplemental Table 3: Post-QC phenotype counts**

| <b>Diameter</b> | <b>n</b> |
|-----------------|----------|
| Aorta 5         | 19300    |
| Aorta 4         | 27102    |
| Aorta 3         | 32259    |
| Aorta 2         | 33870    |
| Aorta 1         | 33866    |
| Aorta 0         | 33857    |
| Aortic root     | 33868    |
| LVOT            | 33870    |

**Supplemental Table 4: Phenotype SNP counts**

| <b>Trait</b> | <b>SNPs</b> |
|--------------|-------------|
| LVOT         | 11247266    |
| Aortic root  | 11247266    |
| Aorta 0      | 11247285    |
| Aorta 1      | 11247281    |
| Aorta 2      | 11247266    |
| Aorta 3      | 11245622    |
| Aorta 4      | 11241047    |
| Aorta 5      | 11241373    |

**Supplemental Table 5: Location of phenotypes**

| <b>Phenotype name</b> | <b>Description</b>                                                                                    |
|-----------------------|-------------------------------------------------------------------------------------------------------|
| Aorta 5               | Diameter of the ascending aorta, 53mm distal to the sinotubular junction for a patient of mean height |
| Aorta 4               | Diameter of the ascending aorta, 43mm distal to the sinotubular junction for a patient of mean height |
| Aorta 3               | Diameter of the ascending aorta, 33mm distal to the sinotubular junction for a patient of mean height |
| Aorta 2               | Diameter of the ascending aorta, 23mm distal to the sinotubular junction for a patient of mean height |
| Aorta 1               | Diameter of the ascending aorta, 13mm distal to the sinotubular junction for a patient of mean height |
| Aorta 0               | Diameter of the ascending aorta, 3mm distal to the sinotubular junction for a patient of mean height  |
| Aortic root           | Diameter of ascending aorta at the level of the sinuses of Valsalva                                   |
| LVOT                  | Diameter of the left ventricular outflow tract                                                        |

**Supplemental Table 6: Prediction of Disease**

| Prevalent disease        | Diameter<br>(scaled) | N (disease) | Beta  | SE    | P        |
|--------------------------|----------------------|-------------|-------|-------|----------|
| Thoracic aortic aneurysm | Aorta 5              | 12          | 1.934 | 0.316 | 9.56E-10 |
| Thoracic aortic aneurysm | Aorta 4              | 12          | 2.293 | 0.301 | 2.82E-14 |
| Thoracic aortic aneurysm | Aorta 3              | 12          | 2.538 | 0.288 | 1.44E-18 |
| Thoracic aortic aneurysm | Aorta 2              | 12          | 2.774 | 0.288 | 7.08E-22 |
| Thoracic aortic aneurysm | Aorta 1              | 12          | 2.556 | 0.288 | 8.28E-19 |
| Thoracic aortic aneurysm | Aorta 0              | 12          | 2.076 | 0.289 | 6.38E-13 |
| Thoracic aortic aneurysm | Aortic root          | 12          | 2.057 | 0.289 | 1.02E-12 |
| Thoracic aortic aneurysm | LVOT                 | 12          | 2.000 | 0.289 | 4.24E-12 |
| Aortic stenosis          | Aorta 5              | 99          | 0.593 | 0.123 | 1.53E-06 |
| Aortic stenosis          | Aorta 4              | 99          | 0.558 | 0.108 | 2.37E-07 |
| Aortic stenosis          | Aorta 3              | 99          | 0.474 | 0.102 | 3.56E-06 |

|                 |             |    |       |       |          |
|-----------------|-------------|----|-------|-------|----------|
| Aortic stenosis | Aorta 2     | 99 | 0.556 | 0.101 | 3.28E-08 |
| Aortic stenosis | Aorta 1     | 99 | 0.433 | 0.101 | 1.83E-05 |
| Aortic stenosis | Aorta 0     | 99 | 0.244 | 0.101 | 0.015    |
| Aortic stenosis | Aortic root | 99 | 0.232 | 0.101 | 0.021    |
| Aortic stenosis | LVOT        | 99 | 0.321 | 0.101 | 0.001    |

**Supplemental Table 7: Correlations between diameters and their polygenic scores**

| Trait       | PRS-Diameter correlation (Pearson's r) |
|-------------|----------------------------------------|
| LVOT        | 0.72                                   |
| Aortic root | 0.72                                   |
| Aorta 0     | 0.75                                   |
| Aorta 1     | 0.75                                   |
| Aorta 2     | 0.76                                   |
| Aorta 3     | 0.77                                   |
| Aorta 4     | 0.79                                   |
| Aorta 5     | 0.84                                   |

**Supplemental Table 8: SNPs in Figure 2A and Supplemental Figure 4**

| <b>Label in figure</b> | <b>Closest gene</b> | <b>SNP</b>             |
|------------------------|---------------------|------------------------|
| ABCC8                  | ABCC8               | rs77889556             |
| ABCC9 1                | ABCC9               | rs4296081              |
| ABCC9 2                | ABCC9               | rs861202               |
| ABCC9 3                | ABCC9               | rs2307024              |
| ADAMTS3                | ADAMTS3             | rs35631249             |
| ADAMTS8                | ADAMTS8             | rs11222084             |
| AEBP2                  | AEBP2               | rs7139226              |
| AIG1 1                 | AIG1                | rs6941056              |
| AIG1 2                 | AIG1                | rs1570350              |
| AIG1 3                 | AIG1                | rs6907215              |
| AIG1 4                 | AIG1                | rs5880559              |
| ANGPT1 1               | ANGPT1              | rs7845785              |
| ANGPT1 2               | ANGPT1              | rs16876090             |
| ANKH                   | ANKH                | 5:15005465_C<br>TCTT_C |
| ANO1 1                 | ANO1                | rs72931748             |
| ANO1 2                 | ANO1                | rs112807178            |
| ANO1 3                 | ANO1                | rs55646508             |



|           |         |                      |
|-----------|---------|----------------------|
| AOC2      | AOC2    | rs35296742           |
| ARID5B    | ARID5B  | rs10995020           |
| ASB2      | ASB2    | rs4905134            |
| ATXN1     | ATXN1   | rs80036911           |
| CACNA1C   | CACNA1C | rs4765663            |
| CBFA2T3 1 | CBFA2T3 | rs488327             |
| CBFA2T3 2 | CBFA2T3 | rs11862605           |
| CBFA2T3 3 | CBFA2T3 | rs533679             |
| CBFA2T3 4 | CBFA2T3 | rs112648265          |
| CDH13     | CDH13   | rs7500448            |
| CDKN1A 1  | CDKN1A  | rs12199346           |
| CDKN1A 2  | CDKN1A  | rs9470366            |
| CEP120 1  | CEP120  | rs77097530           |
| CEP120 2  | CEP120  | rs7734507            |
| CES5A     | CES5A   | rs12708958           |
| COL6A3    | COL6A3  | rs12052878           |
| CPEB4 1   | CPEB4   | rs62376928           |
| CPEB4 2   | CPEB4   | 5:173276788_<br>AT_A |
| CPSF3L    | CPSF3L  | rs76947392           |

|         |        |                      |
|---------|--------|----------------------|
| CRADD 1 | CRADD  | rs903175             |
| CRADD 2 | CRADD  | rs35715048           |
| CRADD 3 | CRADD  | rs4144503            |
| CREB5   | CREB5  | rs917275             |
| DCDC1 1 | DCDC1  | rs146473682          |
| DCDC1 2 | DCDC1  | rs273582             |
| DLEU1 1 | DLEU1  | rs2740515            |
| DLEU1 2 | DLEU1  | rs2687939            |
| DLEU1 3 | DLEU1  | rs2740516            |
| EDN1 1  | EDN1   | rs1630736            |
| EDN1 2  | EDN1   | rs2070699            |
| EIF2B3  | EIF2B3 | rs747347287          |
| ELN 1   | ELN    | rs4717863            |
| ELN 2   | ELN    | rs6974735            |
| ELN 3   | ELN    | rs6943980            |
| ELN 4   | ELN    | rs6460069            |
| ESR1 1  | ESR1   | rs7754762            |
| ESR1 2  | ESR1   | 6:152379347_<br>TA_T |
| ESR1 3  | ESR1   | rs2207231            |

|        |        |                     |
|--------|--------|---------------------|
| ESR1 4 | ESR1   | rs13203975          |
| FBN1 1 | FBN1   | rs17352842          |
| FBN1 2 | FBN1   | rs1036477           |
| FBN1 3 | FBN1   | rs1848050           |
| FBXO32 | FBXO32 | rs6470156           |
| FGD5   | FGD5   | rs73028182          |
| FGF5   | FGF5   | 4:81170475_C<br>T_C |
| FGF9 1 | FGF9   | rs12866004          |
| FGF9 2 | FGF9   | rs9316871           |
| FGF9 3 | FGF9   | rs7994761           |
| FGF9 4 | FGF9   | rs9506822           |
| FGF9 5 | FGF9   | rs1507721           |
| FGF9 6 | FGF9   | rs12869493          |
| FGF9 7 | FGF9   | rs11618858          |
| FGGY 1 | FGGY   | rs12733512          |
| FGGY 2 | FGGY   | rs17535443          |
| FIGN 1 | FIGN   | rs760787102         |
| FIGN 2 | FIGN   | rs16849225          |
| FIGN 3 | FIGN   | rs35930173          |

|         |       |                         |
|---------|-------|-------------------------|
| FLNB 1  | FLNB  | rs2686630               |
| FLNB 2  | FLNB  | rs9869210               |
| FLNB 3  | FLNB  | 3:58133803_A<br>T_A     |
| FLNB 4  | FLNB  | rs13095822              |
| FLNB 5  | FLNB  | rs11710658              |
| FLNB 6  | FLNB  | rs369488034             |
| GATA2 1 | GATA2 | rs62270945              |
| GATA2 2 | GATA2 | rs55914222              |
| GNAO1   | GNAO1 | 16:56221642_<br>AAAT_A  |
| GOSR2   | GOSR2 | rs17677363              |
| HAND2 1 | HAND2 | rs188848834             |
| HAND2 2 | HAND2 | rs67846163              |
| HAS2 1  | HAS2  | rs10089014              |
| HAS2 2  | HAS2  | 8:122634926_<br>CA_C    |
| HELLS   | HELLS | rs1977289               |
| HMGA2 1 | HMGA2 | 12:66404136_<br>AAAAC_A |

|          |        |             |
|----------|--------|-------------|
| HMGA2 2  | HMGA2  | rs10400419  |
| ISL1 1   | ISL1   | rs13158444  |
| ISL1 2   | ISL1   | rs540082300 |
| KALRN    | KALRN  | rs34266187  |
| KCNMA1 1 | KCNMA1 | rs28735     |
| KCNMA1 2 | KCNMA1 | rs40430     |
| KLHL38 1 | KLHL38 | rs7006122   |
| KLHL38 2 | KLHL38 | rs34557926  |
| MAD2L1   | MAD2L1 | rs13134800  |
| MAP2K4 1 | MAP2K4 | rs7221449   |
| MAP2K4 2 | MAP2K4 | rs4791495   |
| MAP2K4 3 | MAP2K4 | rs7215383   |
| MECOM    | MECOM  | rs73030346  |
| MYL4     | MYL4   | rs78033733  |
| OGFRL1 1 | OGFRL1 | rs143917622 |
| OGFRL1 2 | OGFRL1 | rs12195791  |
| OSR1 1   | OSR1   | rs824510    |
| OSR1 2   | OSR1   | rs116595383 |
| OSR1 3   | OSR1   | rs1863777   |

|         |         |                      |
|---------|---------|----------------------|
| PALMD   | PALMD   | 1:100033312_<br>TA_T |
| PARN    | PARN    | 16:14505488_<br>CT_C |
| PCSK1 1 | PCSK1   | rs4264961            |
| PCSK1 2 | PCSK1   | rs764443335          |
| PCSK1 3 | PCSK1   | rs55745974           |
| PCSK1 4 | PCSK1   | rs4077816            |
| PCSK1 5 | PCSK1   | rs4635954            |
| PDE3A 1 | PDE3A   | rs10770612           |
| PDE3A 2 | PDE3A   | rs10841441           |
| PDE3A 3 | PDE3A   | rs10743356           |
| PI15    | PI15    | rs9721183            |
| PIEZO2  | PIEZO2  | rs264282             |
| PLCE1 1 | PLCE1   | rs1343094            |
| PLCE1 2 | PLCE1   | rs77218185           |
| PLEKHA2 | PLEKHA2 | rs112621658          |
| PRDM6 1 | PRDM6   | rs335196             |
| PRDM6 2 | PRDM6   | rs17470137           |
| PTPRR 1 | PTPRR   | rs2137537            |

|          |          |             |
|----------|----------|-------------|
| PTPRR 2  | PTPRR    | rs7304603   |
| REEP3    | REEP3    | rs71463528  |
| SEMA3D 1 | SEMA3D   | rs771025673 |
| SEMA3D 2 | SEMA3D   | rs1583081   |
| SIPA1L2  | SIPA1L2  | rs1285677   |
| SLC24A3  | SLC24A3  | rs6035357   |
| SLC25A26 | SLC25A26 | rs2306272   |
| SLX4IP   | SLX4IP   | rs3063286   |
| SMG6 1   | SMG6     | rs1002135   |
| SMG6 2   | SMG6     | rs1532292   |
| SMG6 3   | SMG6     | rs7213756   |
| SORL1    | SORL1    | rs12280388  |
| SREBF2   | SREBF2   | rs62240962  |
| TBC1D12  | TBC1D12  | rs12785061  |
| TBX20 1  | TBX20    | rs79215950  |
| TBX20 2  | TBX20    | rs1362207   |
| THSD4 1  | THSD4    | rs6494904   |
| THSD4 2  | THSD4    | rs1441358   |
| THSD4 3  | THSD4    | rs11853359  |
| TMEM170B | TMEM170B | rs496236    |

|          |        |             |
|----------|--------|-------------|
| TNRC6B 1 | TNRC6B | rs147036721 |
| TNRC6B 2 | TNRC6B | rs4821942   |
| ULK4 1   | ULK4   | rs5848609   |
| ULK4 2   | ULK4   | rs6794074   |
| USP15    | USP15  | rs56298756  |
| USP3     | USP3   | rs139939693 |
| VTI1A    | VTI1A  | rs34943800  |
| WWP2     | WWP2   | rs62053262  |
| ZNF8     | ZNF8   | rs57785785  |
| ZNF827   | ZNF827 | rs1979974   |



**Supplemental Table 9: SNP heritability of traits**

| <b>Trait</b> | <b>SNP heritability</b> | <b>SE</b> | <b>95% CI min</b> | <b>95% CI max</b> |
|--------------|-------------------------|-----------|-------------------|-------------------|
| LVOT         | 0.22                    | 0.02      | 0.18              | 0.25              |
| Aortic root  | 0.36                    | 0.02      | 0.32              | 0.39              |
| Aorta 0      | 0.37                    | 0.02      | 0.33              | 0.4               |
| Aorta 1      | 0.49                    | 0.02      | 0.45              | 0.52              |
| Aorta 2      | 0.49                    | 0.02      | 0.45              | 0.52              |
| Aorta 3      | 0.44                    | 0.02      | 0.4               | 0.48              |
| Aorta 4      | 0.45                    | 0.02      | 0.4               | 0.49              |
| Aorta 5      | 0.4                     | 0.03      | 0.34              | 0.46              |

**Supplemental Table 10: Results of confirmatory accelerated failure time analysis**

| <b>Incident disease</b>  | <b>Trait</b> | <b>N_Disease</b> | <b>Value</b> | <b>SE</b> | <b>P</b> |
|--------------------------|--------------|------------------|--------------|-----------|----------|
| Aortic stenosis          | LVOT         | 3551             | -4.49E-02    | 1.11E-02  | 5.13E-05 |
| Aortic stenosis          | Aortic root  | 3551             | -5.18E-02    | 1.11E-02  | 2.93E-06 |
| Aortic stenosis          | Aorta 0      | 3551             | -4.90E-02    | 1.10E-02  | 9.02E-06 |
| Aortic stenosis          | Aorta 1      | 3551             | -2.97E-02    | 1.10E-02  | 7.14E-03 |
| Aortic stenosis          | Aorta 2      | 3551             | -1.35E-02    | 1.10E-02  | 2.19E-01 |
| Aortic stenosis          | Aorta 3      | 3551             | -2.34E-03    | 1.10E-02  | 8.31E-01 |
| Aortic stenosis          | Aorta 4      | 3551             | 2.00E-03     | 1.10E-02  | 8.56E-01 |
| Aortic stenosis          | Aorta 5      | 3551             | 5.17E-03     | 1.10E-02  | 6.38E-01 |
| Thoracic aortic aneurysm | LVOT         | 743              | -1.18E-01    | 2.45E-02  | 1.56E-06 |
| Thoracic aortic aneurysm | Aortic root  | 743              | -1.93E-01    | 2.51E-02  | 1.53E-14 |
| Thoracic aortic aneurysm | Aorta 0      | 743              | -2.14E-01    | 2.52E-02  | 2.20E-17 |
| Thoracic aortic aneurysm | Aorta 1      | 743              | -2.25E-01    | 2.54E-02  | 7.57E-19 |
| Thoracic aortic aneurysm | Aorta 2      | 743              | -2.03E-01    | 2.50E-02  | 4.89E-16 |
| Thoracic aortic aneurysm | Aorta 3      | 743              | -1.98E-01    | 2.49E-02  | 2.16E-15 |
| Thoracic aortic aneurysm | Aorta 4      | 743              | -1.61E-01    | 2.46E-02  | 5.58E-11 |
| Thoracic aortic aneurysm | Aorta 5      | 743              | -7.33E-02    | 2.41E-02  | 2.36E-03 |

## References

1. Sudlow C, Gallacher J, Allen N, et al. UK biobank: an open access resource for identifying the causes of a wide range of complex diseases of middle and old age. *PLoS Med.* 2015;12:e1001779.
2. Petersen SE, Matthews PM, Bamberg F, et al. Imaging in population science: cardiovascular magnetic resonance in 100,000 participants of UK Biobank-rationale, challenges and approaches. *J. Cardiovasc. Magn. Reson.* 2013;15:46.
3. Petersen SE, Matthews PM, Francis JM, et al. UK Biobank's cardiovascular magnetic resonance protocol. *J. Cardiovasc. Magn. Reson.* 2015;18:8.
4. Pirruccello JP, Chaffin MD, Chou EL, et al. Deep learning enables genetic analysis of the human thoracic aorta. *Nature Genetics* 2022;54:40–51.
5. Howard J, Gugger S. Fastai: A layered API for deep learning. *Information* 2020;11:108.
6. Ronneberger O, Fischer P, Brox T. U-net: Convolutional networks for biomedical image segmentation. In: *International Conference on Medical image computing and computer-assisted intervention*. Springer, 2015:234–241.
7. Deng J, Dong W, Socher R, Li L-J, Li K, Fei-Fei L. Imagenet: A large-scale hierarchical image database. In: *2009 IEEE conference on computer vision and pattern recognition*. Ieee, 2009:248–255.
8. Zhang TY, Suen CY. A fast parallel algorithm for thinning digital patterns. *Commun. ACM* 1984;27:236–239.
9. van der Walt S, Schönberger JL, Nunez-Iglesias J, et al. scikit-image: image processing in Python. *PeerJ* 2014;2:e453.
10. Bycroft C, Freeman C, Petkova D, et al. The UK Biobank resource with deep phenotyping

and genomic data. *Nature* 2018;562:203–209.

11. Loh P-R, Tucker G, Bulik-Sullivan BK, et al. Efficient Bayesian mixed-model analysis increases association power in large cohorts. *Nat. Genet.* 2015;47:284.
12. Eveborn GW, Schirmer H, Heggelund G, Lunde P, Rasmussen K. The evolving epidemiology of valvular aortic stenosis. the Tromsø study. *Heart* 2013;99:396–400.
13. Mbatchou J, Barnard L, Backman J, et al. Computationally efficient whole-genome regression for quantitative and binary traits. *Nat. Genet.* 2021;53:1097–1103.
14. Chang CC, Chow CC, Tellier LC, Vattikuti S, Purcell SM, Lee JJ. Second-generation PLINK: rising to the challenge of larger and richer datasets. *Gigascience* 2015;4:s13742–015.
15. Van Hout CV, Tachmazidou I, Backman JD, et al. Exome sequencing and characterization of 49,960 individuals in the UK Biobank. *Nature* 2020;586:749–756.
16. Regier AA, Farjoun Y, Larson DE, et al. Functional equivalence of genome sequencing analysis pipelines enables harmonized variant calling across human genetics projects. *Nat. Commun.* 2018;9:4038.
17. McLaren W, Gil L, Hunt SE, et al. The Ensembl Variant Effect Predictor. *Genome Biol.* 2016;17:122.
18. Karczewski KJ, Francioli LC, Tiao G, et al. The mutational constraint spectrum quantified from variation in 141,456 humans. *Nature* 2020;581:434–443.
19. Wild PS, Felix JF, Schillert A, et al. Large-scale genome-wide analysis identifies genetic variants associated with cardiac structure and function. *J. Clin. Invest.* 2017;127:1798–1812.
20. Machiela MJ, Chanock SJ. LDassoc: an online tool for interactively exploring genome-wide association study results and prioritizing variants for functional investigation. *Bioinformatics* 2018;34:887–889.

21. Ge T, Chen C-Y, Ni Y, Feng Y-CA, Smoller JW. Polygenic prediction via Bayesian regression and continuous shrinkage priors. *Nat. Commun.* 2019;10:1776.
22. Kent KC, Zwolak RM, Egorova NN, et al. Analysis of risk factors for abdominal aortic aneurysm in a cohort of more than 3 million individuals. *J. Vasc. Surg.* 2010;52:539–548.
